# Supplementary material for: Palladium-catalyzed paraformaldehyde insertion: a three-component synthesis of benzofurans
Source: Royal Society of Chemistry journal article supplement (doi:10.1039/c6ob00198j), 2016-01-01

## Supporting information for

# Palladium-Catalyzed Paraformaldehyde Insertion: A Three-Component Synthesis of Benzofurans

Xiufang Cheng,<sup>a</sup> Yi Peng,<sup>a</sup> Jun Wu<sup>a</sup> and Guo-Jun Deng<sup>a\*</sup>

<sup>a</sup> Key Laboratory of Environmentally Friendly Chemistry and Application of Ministry of Education, College of Chemistry, Xiangtan University, Xiangtan 411105, China; Fax: (+86)-731-58292251; e-mail: gjdeng@xtu.edu.cn

### Table of Contents

|                                                                    |              |
|--------------------------------------------------------------------|--------------|
| <b>1. General information</b>                                      | <b>2</b>     |
| <b>2. Substrate preparation</b>                                    | <b>2-3</b>   |
| <b>3. General experimental procedure</b>                           | <b>3</b>     |
| <b>4. Characterization data of products</b>                        | <b>3-15</b>  |
| <b>5. References</b>                                               | <b>15-16</b> |
| <b>6. <sup>1</sup>H and <sup>13</sup>C NMR spectra of products</b> | <b>17-41</b> |

**General information:**

All experiments were carried out under an atmosphere of air. Flash column chromatography was performed over silica gel 48-75  $\mu\text{m}$ .  $^1\text{H}$  NMR and  $^{13}\text{C}$  NMR spectra were recorded on a Bruker-AV (400 and 100 MHz, respectively) instrument internally referenced to  $\text{SiMe}_4$  or chloroform signals. MS analyses were performed on an Agilent 5975 GC-MS instrument (EI). The new compounds were characterized by  $^1\text{H}$  NMR,  $^{13}\text{C}$  NMR, MS and HRMS. The structures of known compounds were further corroborated by comparing their  $^1\text{H}$  NMR,  $^{13}\text{C}$  NMR data and MS data with those of literature. The substrates **1c**, **1d**, **1m**, **2j** were synthesized following the literature procedures. All other chemicals and solvents were used as received from commercial sources without further purification.

**General Procedure for the preparation of substrates (1c, 1d, 1m, 2j):**Substrate **1c**<sup>[1]</sup>:

Bromine (11.6 mL, 0.23 mol) was added slowly to a cooled 0 °C of 4-ethylphenol (25 g, 0.21 mol) dissolved in  $\text{CH}_2\text{Cl}_2$  (125 mL). After the addition was complete the reaction mixture was stirred for 10 minutes and then quenched with 1 M NaOH. The reaction mixture was diluted with  $\text{H}_2\text{O}$  and the layers separated. The organic layer was concentrated to an orange oil. Purification by flash column chromatography (0 percent to 5% ethyl acetate in petroleum ether) gave the title compound **1c** as a clear oil.

Substrate **1d**<sup>[2]</sup>:

To a solution of 4-propylphenol (20 mmol) in chloroform (20 mL),  $\text{NaHCO}_3$  (2 g, 24 mmol) was added. The resulting suspension was cooled to 0 °C. While a solution of elementary bromine (1.12 mL, 22 mmol) in chloroform (8 mL) was slowly added, the suspension was vigorously stirred. After completion of the reaction, monitored by TLC the suspension was filtered. The filter with the solid residue was rinsed once with 50 mL of chloroform. The combined organic solution was evaporated under reduced pressure. The final work up of **1d** was done either by distillation or by column chromatography (petroleum ether: ethyl acetate = 9:1).

Substrate **1m**<sup>[3]</sup>:

To a solution of 3,4-dimethylphenol (2.48 g, 20.3 mmol, 1 equiv) in dichloromethane (200 mL) at  $-78\text{ }^{\circ}\text{C}$  was added dropwise bromine (1.05 mL, 20.3 mmol, 1 equiv). After 1 h, 1 M  $\text{Na}_2\text{SO}_3$  was added and the cold bath was removed. After warming to ambient temperature, the dichloromethane layer was separated, dried over  $\text{Mg}_2\text{SO}_4$  and concentrated in vacuo to provide **1m** as a yellow solid.

Substrate **2j**<sup>[4]</sup>:

2-Acetylthiophene (6 g, 47.6 mmol) was dissolved in chloroform (60 mL) and added to a slurry of  $\text{CuBr}_2$  (13.5 g, 60.4 mmol) in ethyl acetate (120 mL). The mixture was refluxed for 6 h and then filtered while still hot through a celite pad. The filtrate cake was washed with ethyl acetate and the combined filtrate was evaporated to give **2j**.

#### General procedure for preparation of **3a**:

A 10 mL oven-dried reaction vessel was charged with  $\text{Pd}(\text{COD})\text{Cl}_2$  (2.9 mg, 0.01 mmol), diphenyl-2-pyridylphosphine (dpppy, 5.3 mg, 0.02 mmol),  $\text{K}_2\text{CO}_3$  (83.0 mg, 0.6 mmol), 2-bromophenol (**1a**, 23  $\mu\text{L}$ , 0.2 mmol), paraformaldehyde (15.0 mg, 0.5 mmol), 2-bromo-1-phenylethanone (**2a**, 60 mg, 0.3 mmol) and DMSO (0.8 mL). The resulting solution was sealed under air and stirred at  $140\text{ }^{\circ}\text{C}$  for 24 h. After cooling to room temperature, the volatiles were removed under vacuum and the residue was purified by column chromatography (neutral aluminum oxide, petroleum ether/ethyl acetate = 40:1) to give **3a** as white solid; yield: 36.0 mg (81%).

**Benzofuran-2-yl(phenyl)methanone (3a, CAS: 6272-40-8)**<sup>[5]</sup>

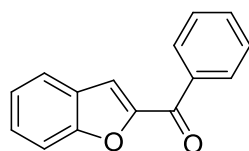

$^1\text{H}$  NMR (400 MHz,  $\text{CDCl}_3$ , ppm)  $\delta$  8.06-8.04 (m, 2H), 7.74 (d,  $J = 8.0$  Hz, 1H), 7.66-7.63 (m, 2H), 7.56-7.49 (m, 4H), 7.34 (d,  $J = 8.0$  Hz, 1H);  $^{13}\text{C}$  NMR (100 MHz,  $\text{CDCl}_3$ , ppm)  $\delta$  184.4, 156.0, 152.3, 137.3, 132.9, 129.5, 128.5, 128.4, 127.0, 124.0, 123.3, 116.5, 112.6; MS (EI)  $m/z$  (%) 222 (100), 194, 145, 105, 77.

**Benzofuran-2-yl(4-methoxyphenyl)methanone (3b, CAS: 63157-19-7)**<sup>[6]</sup>

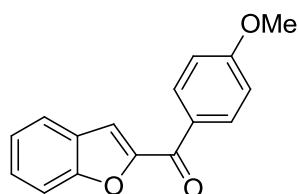

The reaction was conducted with methyl 2-bromophenol (**1a**, 34.6 mg, 0.2 mmol), paraformaldehyde (15.0 mg, 0.5 mmol) and 2-bromo-1-(4-methoxyphenyl)ethanone (**2b**, 68.7 mg, 0.3 mmol). The residue was purified by column chromatography (silica gel, petroleum ether/ethyl acetate = 40:1) to give **3b** as white solid; yield 64%.

<sup>1</sup>H NMR (400 MHz, CDCl<sub>3</sub>, ppm)  $\delta$  8.12 (d,  $J$  = 8.0 Hz, 2H), 8.28 (s, 1H), 7.73 (d,  $J$  = 8.0 Hz, 1H), 7.64 (d,  $J$  = 8.0 Hz, 1H), 7.53-7.47 (m, 2H), 7.33 (t,  $J$  = 8.0 Hz, 1H), 7.03 (d,  $J$  = 8.0 Hz, 1H), 3.92 (s, 3H); <sup>13</sup>C NMR (100 MHz, CDCl<sub>3</sub>, ppm)  $\delta$  182.2, 163.7, 155.9, 153.4, 132.0, 130.1, 127.8, 127.1, 123.9, 123.1, 114.8, 114.0, 112.5, 55.5; MS (EI)  $m/z$  (%) 252, 221, 135 (100), 107, 77.

**[1,1'-Biphenyl]-4-yl(benzofuran-2-yl)methanone (3c, CAS: 82158-42-7)**<sup>[7]</sup>

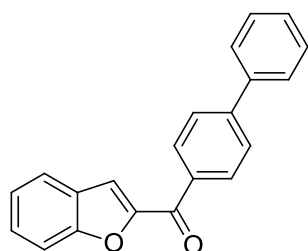

The reaction was conducted with methyl 2-bromophenol (**1a**, 34.6 mg, 0.2 mmol), paraformaldehyde (15.0 mg, 0.5 mmol) and 1-([1,1'-biphenyl]-4-yl)-2-bromoethanone (**2c**, 82.5 mg, 0.3 mmol). The residue was purified by column chromatography (silica gel, petroleum ether/ethyl acetate = 40:1) to give **3c** as white solid; yield 81%.

<sup>1</sup>H NMR (400 MHz, CDCl<sub>3</sub>, ppm)  $\delta$  8.16 (d,  $J$  = 8.0 Hz, 2H), 7.78-7.74 (m, 3H), 7.68-7.66 (m, 3H), 7.59 (s, 1H), 7.54-7.48 (m, 3H), 7.44-7.41 (m, 1H), 7.35 (t,  $J$  = 8.0 Hz, 1H); <sup>13</sup>C NMR (100 MHz, CDCl<sub>3</sub>, ppm)  $\delta$  183.8, 156.0, 152.5, 145.7, 139.9, 135.9, 130.1, 129.0, 128.3, 128.3, 127.3, 127.2, 127.1, 124.0, 123.3, 116.2, 112.6; MS (EI)  $m/z$  (%) 298, 221, 181 (100), 152, 77.

**Benzofuran-2-yl(4-fluorophenyl)methanone (3d, CAS: 27044-77-5)**<sup>[6]</sup>

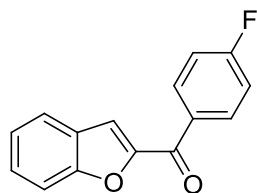

The reaction was conducted with methyl 2-bromophenol (**1a**, 34.6 mg, 0.2 mmol), paraformaldehyde (15.0 mg, 0.5 mmol) and 2-bromo-1-(4-fluorophenyl)ethanone (**2d**, 65.1 mg, 0.3 mmol). The residue was purified by column chromatography (silica gel, petroleum ether/ethyl acetate = 40:1) to give **3d** as white solid; yield 46%.

$^1\text{H}$  NMR (400 MHz,  $\text{CDCl}_3$ , ppm)  $\delta$  8.14 (dd,  $J_1 = 8.6$  Hz,  $J_2 = 5.5$  Hz, 2H), 7.71 (d,  $J = 8.0$  Hz, 1H), 7.66-7.64 (m, 1H), 7.56-7.50 (m, 2H), 7.37-7.34 (m, 1H), 7.25-7.21 (m, 2H);  $^{13}\text{C}$  NMR (100 MHz,  $\text{CDCl}_3$ , ppm)  $\delta$  182.5, 165.5 (d,  $J = 253.3$  Hz), 155.8, 151.9, 133.2 (d,  $J = 3.0$  Hz), 132.0 (d,  $J = 9.2$  Hz), 128.3, 126.7, 123.9, 123.2, 116.2, 115.6 ( $J = 21.8$  Hz), 112.3; MS (EI)  $m/z$  (%) 240, 145, 123 (100), 95, 89.

#### **Benzofuran-2-yl(4-chlorophenyl)methanone (3e, CAS: 27052-20-6)**<sup>[5]</sup>

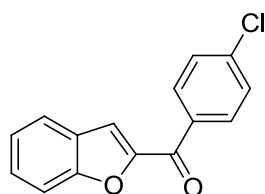

The reaction was conducted with methyl 2-bromophenol (**1a**, 34.6 mg, 0.2 mmol), paraformaldehyde (15.0 mg, 0.5 mmol) and 2-bromo-1-(4-chlorophenyl)ethanone (**2e**, 70.1 mg, 0.3 mmol). The residue was purified by column chromatography (silica gel, petroleum ether/ethyl acetate = 40:1) to give **3e** as white solid; yield 40%.

$^1\text{H}$  NMR (400 MHz,  $\text{CDCl}_3$ , ppm)  $\delta$  8.04 (d,  $J = 8.0$  Hz, 2H), 7.75-7.74 (m, 1H), 7.66-7.64 (m, 1H), 7.56-7.52 (m, 4H), 7.37-7.35 (t,  $J = 8.0$  Hz, 1H);  $^{13}\text{C}$  NMR (100 MHz,  $\text{CDCl}_3$ , ppm)  $\delta$  182.9, 156.0, 152.0, 139.4, 135.4, 130.9, 128.9, 128.5, 126.9, 124.1, 123.3, 116.5, 112.5; MS (EI)  $m/z$  (%) 256, 221, 139 (100), 89, 75.

#### **Benzofuran-2-yl(2-chlorophenyl)methanone (3f)**<sup>[5]</sup>

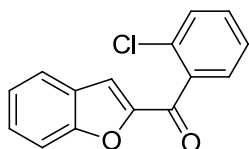

The reaction was conducted with methyl 2-bromophenol (**1a**, 34.6 mg, 0.2 mmol), paraformaldehyde (15.0 mg, 0.5 mmol) and 2-bromo-1-(2-chlorophenyl)ethanone (**2f**, 70.1 mg, 0.3 mmol). The residue was purified by column chromatography (silica gel, petroleum ether/ethyl acetate = 40:1) to give **3f** as yellow liquid; yield 40%.

$^1\text{H}$  NMR (400 MHz,  $\text{CDCl}_3$ , ppm)  $\delta$  7.79 (d,  $J = 8.0$  Hz, 1H), 7.64-7.62 (m, 1H), 7.55-7.47 (m, 4H), 7.42-7.39 (m, 1H), 7.34-7.31 (m, 2H);  $^{13}\text{C}$  NMR (100 MHz,  $\text{CDCl}_3$ , ppm)  $\delta$  183.8, 156.4, 151.9, 137.4, 131.8, 131.7, 130.3, 129.3, 128.9, 127.0, 126.6, 124.1, 123.5, 117.7, 112.7; MS (EI)  $m/z$  (%) 256, 221, 145 (100), 111, 75.

#### Benzofuran-2-yl(3-chlorophenyl)methanone (**3g**)

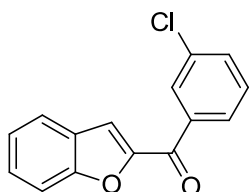

The reaction was conducted with methyl 2-bromophenol (**1a**, 34.6 mg, 0.2 mmol), paraformaldehyde (15.0 mg, 0.5 mmol) and 2-bromo-1-(3-chlorophenyl)ethanone (**2g**, 70.1 mg, 0.3 mmol). The residue was purified by column chromatography (silica gel, petroleum ether/ethyl acetate = 40:1) to give **3g** as white solid; yield 41%.

$^1\text{H}$  NMR (400 MHz,  $\text{CDCl}_3$ , ppm)  $\delta$  8.04 (s, 1H), 7.95 (d,  $J = 8.0$  Hz, 1H), 7.75 (d,  $J = 8.0$  Hz, 1H), 7.67-7.61 (m, 2H), 7.57-7.47 (m, 3H), 7.36 (t,  $J = 8.0$  Hz, 1H);  $^{13}\text{C}$  NMR (100 MHz,  $\text{CDCl}_3$ , ppm)  $\delta$  182.8, 156.1, 151.9, 138.7, 134.8, 132.8, 129.9, 129.4, 128.7, 127.6, 126.8, 124.1, 123.4, 116.8, 112.6; MS (EI)  $m/z$  (%) 256, 221, 145 (100), 89, 75; HRMS calcd. for:  $\text{C}_{15}\text{H}_{10}\text{ClO}_2$   $[\text{M}+\text{H}]^+ = 257.0369$ , found = 257.0365.

#### Benzofuran-2-yl(4-(trifluoromethyl)phenyl)methanone (**3h**, CAS: 512171-87-8)<sup>[81]</sup>

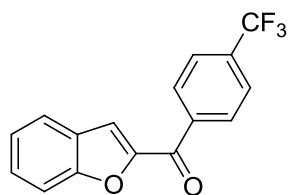

The reaction was conducted with methyl 2-bromophenol (**1a**, 34.6 mg, 0.2 mmol), paraformaldehyde (15.0 mg, 0.5 mmol) and 2-bromo-1-(4-(trifluoromethyl)phenyl)ethanone (**2h**, 80.1 mg, 0.3 mmol). The residue was purified by column chromatography (silica gel, petroleum ether/ethyl acetate = 40:1) to give **3h** as white solid; yield 60%.

$^1\text{H}$  NMR (400 MHz,  $\text{CDCl}_3$ , ppm)  $\delta$  8.16 (d,  $J = 8.0$  Hz, 2H), 7.82 (d,  $J = 8.0$  Hz, 2H), 7.75 (d,  $J = 8.0$  Hz, 1H), 7.66-7.64 (m, 1H), 7.58-7.52 (m, 2H), 7.36 (t,  $J = 8.0$  Hz, 1H);  $^{13}\text{C}$  NMR (100 MHz,  $\text{CDCl}_3$ , ppm)  $\delta$  183.1, 156.2, 151.9, 140.1, 134.2 (q,  $J = 32.6$ ), 129.8, 128.9, 126.9, 125.6 (q,  $J = 3.6$ ), 125.0, 124.2, 123.4, 117.0, 112.6; MS (EI)  $m/z$  (%) 290, 221, 145 (100), 105, 89.

#### Benzofuran-2-yl(naphthalen-2-yl)methanone (**3i**)

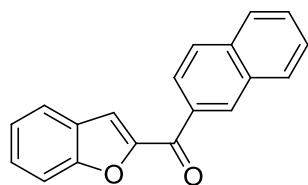

The reaction was conducted with methyl 2-bromophenol (**1a**, 34.6 mg, 0.2 mmol), paraformaldehyde (15.0 mg, 0.5 mmol) and 2-bromo-1-(naphthalen-2-yl)ethanone (**2i**, 74.7 mg, 0.3 mmol). The residue was purified by column chromatography (silica gel, petroleum ether/ethyl acetate = 40:1) to give **3i** as white solid; yield 45%.

$^1\text{H}$  NMR (400 MHz,  $\text{CDCl}_3$ , ppm)  $\delta$  8.62 (s, 1H), 8.10-8.08 (m, 1H), 8.02-7.92 (m, 3H), 7.77-7.75 (m, 1H), 7.70-7.60 (m, 4H), 7.52 (t,  $J = 8.0$  Hz, 1H), 7.37-7.34 (m, 1H);  $^{13}\text{C}$  NMR (100 MHz,  $\text{CDCl}_3$ , ppm)  $\delta$  184.2, 156.0, 152.5, 135.5, 134.5, 132.4, 131.1, 129.5, 128.5, 128.5, 128.3, 127.8, 127.0, 126.9, 125.2, 124.0, 123.3, 116.4, 112.6; MS (EI)  $m/z$  (%) 272 (100), 244, 155, 127, 77; HRMS calcd. for:  $\text{C}_{19}\text{H}_{12}\text{O}_2$   $[\text{M}+\text{H}]^+ = 273.0916$ , found = 273.0912.

#### Benzofuran-2-yl(thiophen-2-yl)methanone (**3j**)<sup>[9]</sup>

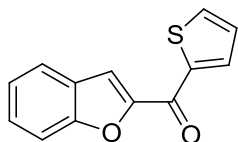

The reaction was conducted with methyl 2-bromophenol (**1a**, 34.6 mg, 0.2 mmol), paraformaldehyde (15.0 mg, 0.5 mmol) and 2-bromo-1-(thiophen-2-yl)ethanone (**2j**, 61.5 mg, 0.3 mmol). The residue was purified by column chromatography (silica gel, petroleum ether/ethyl acetate = 40:1) to give **3j** as brown solid; yield 52%.

<sup>1</sup>H NMR (400 MHz, CDCl<sub>3</sub>, ppm)  $\delta$  8.34-8.33 (m, 1H), 7.78-7.73 (m, 3H), 7.66-7.64 (m, 1H), 7.51 (q,  $J = 8.0$  Hz, 1H), 7.37-7.33 (m, 1H), 7.27-7.25 (m, 1H); <sup>13</sup>C NMR (100 MHz, CDCl<sub>3</sub>, ppm)  $\delta$  175.0, 155.8, 152.6, 142.3, 134.6, 134.5, 128.4, 128.2, 127.0, 124.0, 123.3, 114.6, 112.4; MS (EI)  $m/z$  (%) 228, 200, 145, 111 (100), 89.

#### (5-Methylbenzofuran-2-yl)(phenyl)methanone (**3k**, CAS: 101277-97-8)<sup>[10]</sup>

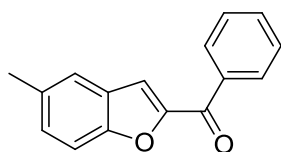

The reaction was conducted with 2-bromo-4-methylphenol (**1b**, 37.4 mg, 0.2 mmol), paraformaldehyde (15.0 mg, 0.5 mmol) and 2-bromo-1-phenylethanone (**2a**, 60 mg, 0.3 mmol). The residue was purified by column chromatography (silica gel, petroleum ether/ethyl acetate = 40:1) to give **3k** as white solid; yield 51%.

<sup>1</sup>H NMR (400 MHz, CDCl<sub>3</sub>, ppm)  $\delta$  8.05-8.03 (m, 2H), 7.63-7.62 (m, 1H), 7.55-7.50 (m, 4H), 7.46 (s, 1H), 7.32-7.30 (m, 1H), 2.47 (s, 3H); <sup>13</sup>C NMR (100 MHz, CDCl<sub>3</sub>, ppm)  $\delta$  184.4, 154.6, 152.4, 137.3, 133.6, 132.8, 120.0, 129.4, 128.5, 127.1, 122.7, 116.3, 112.1, 21.3; MS (EI)  $m/z$  (%) 236, 207 (100), 159, 105, 77.

#### (5-Ethylbenzofuran-2-yl)(phenyl)methanone (**3l**)

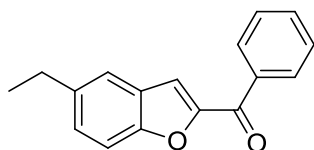

The reaction was conducted with 2-bromo-4-ethylphenol (**1c**, 40.2 mg, 0.2 mmol), paraformaldehyde (15.0 mg, 0.5 mmol) and 2-bromo-1-phenylethanone (**2a**, 60 mg, 0.3 mmol).



The residue was purified by column chromatography (silica gel, petroleum ether/ethyl acetate = 40:1) to give **3l** as yellow liquid; yield 62%.

<sup>1</sup>H NMR (400 MHz, CDCl<sub>3</sub>, ppm) δ 8.04 (d, *J* = 8.0 Hz, 2H), 7.64-7.62 (m, 1H), 7.56-7.52 (m, 4H), 7.48 (s, 1H), 7.36-7.34 (m, 1H), 2.77 (d, *J* = 8.0 Hz, 2H), 1.31-1.28 (m, 3H); <sup>13</sup>C NMR (100 MHz, CDCl<sub>3</sub>, ppm) δ 184.4, 154.7, 152.4, 140.2, 137.3, 132.8, 129.4, 129.0, 128.5, 127.1, 121.5, 116.5, 112.2, 28.7, 16.3; MS (EI) *m/z* (%) 250, 235 (100), 207, 105, 77; HRMS calcd. for: C<sub>17</sub>H<sub>15</sub>O<sub>2</sub> [M+H]<sup>+</sup> = 251.1072, found = 251.1069.

### Phenyl(5-propylbenzofuran-2-yl)methanone (**3m**)

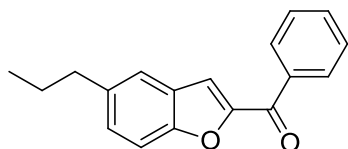

The reaction was conducted with 2-bromo-4-propylphenol (**1d**, 43.2 mg, 0.2 mmol), paraformaldehyde (15.0 mg, 0.5 mmol) and 2-bromo-1-phenylethanone (**2a**, 60 mg, 0.3 mmol). The residue was purified by column chromatography (silica gel, petroleum ether/ethyl acetate = 40:1) to give **3m** as yellow liquid; yield 77%.

<sup>1</sup>H NMR (400 MHz, CDCl<sub>3</sub>, ppm) δ 8.04 (d, *J* = 8.0 Hz, 2H), 7.65-7.61 (m, 1H), 7.55-7.47 (m, 5H), 7.33-7.31 (m, 1H), 2.70 (t, *J* = 8.0 Hz, 2H), 1.73-1.64 (m, 2H), 0.96 (t, *J* = 8.0 Hz, 3H); <sup>13</sup>C NMR (100 MHz, CDCl<sub>3</sub>, ppm) δ 184.4, 154.7, 152.4, 142.5, 137.3, 132.8, 129.5, 129.4, 128.5, 127.0, 122.2, 116.4, 112.1, 37.8, 24.9, 13.7; MS (EI) *m/z* (%) 264, 235 (100), 207, 105, 77; HRMS calcd. for: C<sub>18</sub>H<sub>17</sub>O<sub>2</sub> [M+H]<sup>+</sup> = 265.1229, found = 265.1218.

### (5-Methoxybenzofuran-2-yl)(phenyl)methanone (**3n**, 383159-30-6)<sup>[11]</sup>

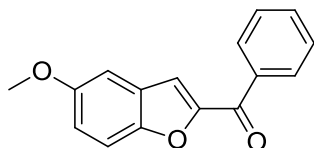

The reaction was conducted with 2-bromo-4-methoxyphenol (**1e**, 40.6 mg, 0.2 mmol), paraformaldehyde (15.0 mg, 0.5 mmol) and 2-bromo-1-phenylethanone (**2a**, 60 mg, 0.3 mmol). The residue was purified by column chromatography (silica gel, petroleum ether/ethyl acetate = 40:1) to give **3n** as white solid; yield 60%.

$^1\text{H}$  NMR (400 MHz,  $\text{CDCl}_3$ , ppm)  $\delta$  8.05 (d,  $J = 8.0$  Hz, 2H), 7.64 (t,  $J = 8.0$  Hz, 1H), 7.56-7.52 (m, 3H), 7.48 (s, 1H), 7.13-7.11 (m, 2H), 3.87 (s, 3H);  $^{13}\text{C}$  NMR (100 MHz,  $\text{CDCl}_3$ , ppm)  $\delta$  184.2, 156.7, 153.0, 151.2, 137.3, 132.8, 129.5, 128.5, 127.5, 118.5, 116.4, 113.2, 104.0, 55.9; MS (EI)  $m/z$  (%) 252 (100), 207, 175, 105, 77.

**(5-Fluorobenzofuran-2-yl)(phenyl)methanone (3o)**

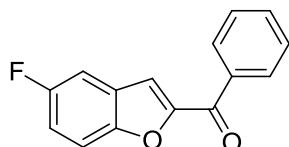

The reaction was conducted with 2-bromo-4-fluorophenol (**1f**, 38.2 mg, 0.2 mmol), paraformaldehyde (15.0 mg, 0.5 mmol) and 2-bromo-1-phenylethanone (**2a**, 60 mg, 0.3 mmol). The residue was purified by column chromatography (silica gel, petroleum ether/ethyl acetate = 40:1) to give **3o** as white solid; yield 78%.

$^1\text{H}$  NMR (500 MHz,  $\text{CDCl}_3$ , ppm)  $\delta$  8.05 (d,  $J = 8.0$  Hz, 2H), 7.67-7.63 (m, 1H), 7.61-7.50 (m, 4H), 7.39-7.36 (m, 1H), 7.24-7.21 (m, 1H);  $^{13}\text{C}$  NMR (125 MHz,  $\text{CDCl}_3$ , ppm)  $\delta$  184.1, 159.6 (d,  $J = 239.6$  Hz), 153.8, 152.3, 137.0, 133.1, 129.5, 128.6, 116.7 (d,  $J = 26.7$  Hz), 116.1, 116.0, 113.6 (d,  $J = 9.5$  Hz), 108.2 (d,  $J = 24.8$  Hz); MS (EI)  $m/z$  (%) 240, 223, 163, 105 (100), 77; HRMS calcd. for:  $\text{C}_{15}\text{H}_{10}\text{FO}_2$   $[\text{M}+\text{H}]^+ = 241.0665$ , found = 241.0659.

**(5-Chlorobenzofuran-2-yl)(phenyl)methanone (3p, CAS: 100914-68-9)<sup>[5]</sup>**

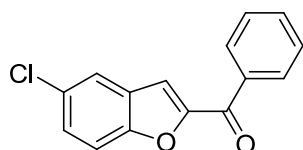

The reaction was conducted with 2-bromo-4-chlorophenol (**1g**, 41.4 mg, 0.2 mmol), paraformaldehyde (15.0 mg, 0.5 mmol) and 2-bromo-1-phenylethanone (**2a**, 60 mg, 0.3 mmol). The residue was purified by column chromatography (silica gel, petroleum ether/ethyl acetate = 40:1) to give **3p** as white solid; yield 68%.

$^1\text{H}$  NMR (400 MHz,  $\text{CDCl}_3$ , ppm)  $\delta$  8.05-8.04 (m, 2H), 7.71-7.71 (m, 1H), 7.67-7.64 (m, 1H), 7.59-7.53 (m, 3H), 7.47-7.44 (m, 2H);  $^{13}\text{C}$  NMR (100 MHz,  $\text{CDCl}_3$ , ppm)  $\delta$  184.1, 154.2, 153.3,

136.8, 133.1, 129.6, 129.4, 128.6, 128.6, 128.2, 122.6, 115.4, 113.6; MS (EI) m/z (%) 256, 221, 179, 105 (100), 77.

### 2-Benzoylbenzofuran-5-carbonitrile (**3q**)

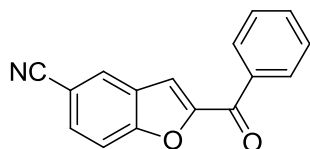

The reaction was conducted with 3-bromo-4-hydroxybenzonitrile (**1h**, 39.6 mg, 0.2 mmol), paraformaldehyde (15.0 mg, 0.5 mmol) and 2-bromo-1-phenylethanone (**2a**, 60 mg, 0.3 mmol). The residue was purified by column chromatography (silica gel, petroleum ether/ethyl acetate = 20:1) to give **3q** as white solid; yield 42%.

<sup>1</sup>H NMR (400 MHz, CDCl<sub>3</sub>, ppm)  $\delta$  8.11 (s, 1H), 8.05 (d, *J* = 8.0 Hz, 2H), 7.76 (s, 2H), 7.70-7.67 (m, 1H), 7.59-7.55 (m, 3H); <sup>13</sup>C NMR (100 MHz, CDCl<sub>3</sub>, ppm)  $\delta$  183.7, 157.1, 154.0, 136.5, 133.5, 131.1, 129.5, 128.7, 128.5, 127.6, 118.6, 115.0, 113.9, 108.3; MS (EI) m/z (%) 247, 230, 190, 105 (100), 77; HRMS calcd. for: C<sub>16</sub>H<sub>10</sub>NO<sub>2</sub> [M+H]<sup>+</sup> = 248.0712, found = 248.0710.

### Phenyl(5-phenylbenzofuran-2-yl)methanone (**3r**, CAS: 102183-99-3)

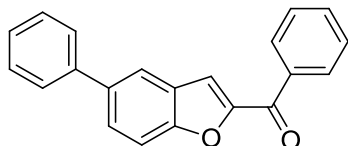

The reaction was conducted with 3-bromo-(1,1'-biphenyl)-4-ol (**1i**, 49.8 mg, 0.2 mmol), paraformaldehyde (15.0 mg, 0.5 mmol) and 2-bromo-1-phenylethanone (**2a**, 60 mg, 0.3 mmol). The residue was purified by column chromatography (silica gel, petroleum ether/ethyl acetate = 40:1) to give **3r** as white solid; yield 70%.

<sup>1</sup>H NMR (500 MHz, CDCl<sub>3</sub>, ppm)  $\delta$  8.07 (d, *J* = 8.0 Hz, 2H), 7.90 (s, 1H), 7.75-7.71 (m, 2H), 7.69-7.61 (m, 3H), 7.58-7.54 (m, 3H), 7.47 (t, *J* = 8.0 Hz, 2H), 7.40-7.36 (m, 1H); <sup>13</sup>C NMR (100 MHz, CDCl<sub>3</sub>, ppm)  $\delta$  184.3, 155.5, 152.8, 140.8, 137.7, 137.1, 132.9, 129.4, 128.8, 128.5, 128.2, 127.5, 127.4, 127.3, 121.4, 116.6, 112.7; MS (EI) m/z (%) 298 (100), 221, 165, 105, 77.

### (4-Fluorobenzofuran-2-yl)(phenyl)methanone (**3s**)

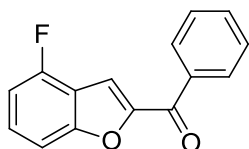

The reaction was conducted with 2-bromo-3-fluorophenol (**1j**, 38.2 mg, 0.2 mmol), paraformaldehyde (15.0 mg, 0.5 mmol) and 2-bromo-1-phenylethanone (**2a**, 60 mg, 0.3 mmol). The residue was purified by column chromatography (silica gel, petroleum ether/ethyl acetate = 40:1) to give **3s** as white solid; yield 58%.

$^1\text{H}$  NMR (400 MHz,  $\text{CDCl}_3$ , ppm)  $\delta$  8.05 (d,  $J = 8.0$  Hz, 2H), 7.68-7.64 (m, 1H), 7.59-7.54 (m, 3H), 7.49-7.43 (m, 2H), 7.04-7.00 (m, 1H);  $^{13}\text{C}$  NMR (100 MHz,  $\text{CDCl}_3$ , ppm)  $\delta$  183.9, 157.0 (d,  $J = 252.6$  Hz), 152.0, 136.8, 133.1, 129.4, 129.0 (d,  $J = 7.7$  Hz), 128.6, 116.8, (d,  $J = 21.9$  Hz), 112.3, 109.1 (d,  $J = 18.4$  Hz), 108.7, 108.6; MS (EI)  $m/z$  (%) 240, 223, 163, 105 (100), 77;  $\text{C}_{15}\text{H}_{10}\text{FO}_2$   $[\text{M}+\text{H}]^+ = 241.0665$ , found = 241.0659.

#### (6-Fluorobenzofuran-2-yl)(phenyl)methanone (**3t**)

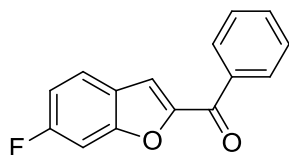

The reaction was conducted with 2-bromo-5-fluorophenol (**1k**, 38.2 mg, 0.2 mmol), paraformaldehyde (15.0 mg, 0.5 mmol) and 2-bromo-1-phenylethanone (**2a**, 60 mg, 0.3 mmol). The residue was purified by column chromatography (silica gel, petroleum ether/ethyl acetate = 40:1) to give **3t** as white solid; yield 66%.

$^1\text{H}$  NMR (400 MHz,  $\text{CDCl}_3$ , ppm)  $\delta$  8.05-8.03 (m, 2H), 7.71-7.64 (m, 2H), 7.57-7.51 (m, 3H), 7.37-7.35 (s, 1H), 7.15-7.11 (m, 1H);  $^{13}\text{C}$  NMR (100 MHz,  $\text{CDCl}_3$ , ppm)  $\delta$  183.9, 163.2 (d,  $J = 246.7$  Hz), 137.1, 133.0, 129.4, 128.6, 128.6, 124.1 (d,  $J = 10.3$  Hz), 123.4, 116.3, 116.2, 113.2 (d,  $J = 24.6$  Hz), 100.0 (d,  $J = 26.5$  Hz); MS (EI)  $m/z$  (%) 240, 223, 163, 105 (100), 77; HRMS calcd. for:  $\text{C}_{15}\text{H}_{10}\text{FO}_2$   $[\text{M}+\text{H}]^+ = 241.0665$ , found = 241.0660.

#### Phenyl(6-(trifluoromethyl)benzofuran-2-yl)methanone (**3u**)

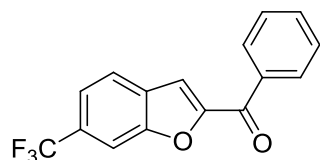

The reaction was conducted with 2-bromo-5-(trifluoromethyl)phenol (**1l**, 48.2 mg, 0.2 mmol), paraformaldehyde (15.0 mg, 0.5 mmol) and 2-bromo-1-phenylethanone (**2a**, 60 mg, 0.3 mmol). The residue was purified by column chromatography (silica gel, petroleum ether/ethyl acetate = 40:1) to give **3u** as white solid; yield 50%.

$^1\text{H}$  NMR (400 MHz,  $\text{CDCl}_3$ , ppm)  $\delta$  8.08 (d,  $J = 8.0$  Hz, 2H), 7.93 (s, 1H), 7.87-7.85 (m, 1H), 7.69-7.65 (s, 1H), 7.61-7.54 (m, 4H);  $^{13}\text{C}$  NMR (100 MHz,  $\text{CDCl}_3$ , ppm)  $\delta$  183.9, 154.8, 154.5, 136.7, 135.1, 134.5, 133.4, 129.6, 128.7, 123.9, 122.6, 120.8 (q,  $J = 3.6$  Hz), 115.1, 110.3 (q,  $J = 4.1$  Hz); MS (EI)  $m/z$  (%) 290, 262, 213, 105 (100), 77.

#### (5,6-Dimethylbenzofuran-2-yl)(phenyl)methanone (**3v**)

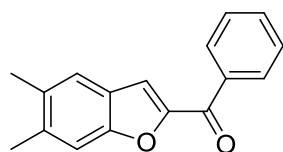

The reaction was conducted with 2-bromo-4,5-dimethylphenol (**1m**, 40.2 mg, 0.2 mmol), paraformaldehyde (15.0 mg, 0.5 mmol) and 2-bromo-1-phenylethanone (**2a**, 60 mg, 0.3 mmol). The residue was purified by column chromatography (silica gel, petroleum ether/ethyl acetate = 40:1) to give **3v** as white solid; yield 68%.

$^1\text{H}$  NMR (400 MHz,  $\text{CDCl}_3$ , ppm)  $\delta$  8.02 (d,  $J = 8.0$  Hz, 2H), 7.64-7.61 (m, 1H), 7.55-7.51 (m, 2H), 7.45-7.42 (m, 3H), 2.41 (s, 3H), 2.36 (s, 3H);  $^{13}\text{C}$  NMR (100 MHz,  $\text{CDCl}_3$ , ppm)  $\delta$  184.3, 155.4, 151.9, 138.6, 137.5, 133.0, 132.6, 129.4, 128.4, 125.0, 122.9, 116.6, 112.7, 20.9, 20.0; MS (EI)  $m/z$  (%) 250 (100), 235, 173, 105, 77; HRMS calcd. for:  $\text{C}_{17}\text{H}_{15}\text{O}_2$   $[\text{M}+\text{H}]^+ = 251.1072$ , found = 251.1068.

#### Naphtho[2,3-b]furan-2-yl(phenyl)methanone (**3w**, CAS: 82158-50-7)

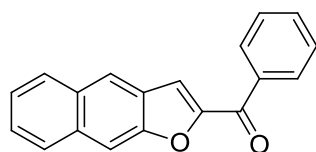

The reaction was conducted with 3-bromonaphthalen-2-ol (**1n**, 44.6 mg, 0.2 mmol), paraformaldehyde (15.0 mg, 0.5 mmol) and 2-bromo-1-phenylethanone (**2a**, 60 mg, 0.3 mmol). The residue was purified by column chromatography (silica gel, petroleum ether/ethyl acetate = 20:1) to give **3w** as yellow liquid; yield 52%.

<sup>1</sup>H NMR (400 MHz, CDCl<sub>3</sub>, ppm) δ 8.18 (d, *J* = 8.0 Hz, 1H), 8.10 (d, *J* = 8.0 Hz, 2H), 8.02 (s, 2H), 7.98 (d, *J* = 8.0 Hz, 1H), 7.93-7.91 (m, 1H), 7.76-7.74 (m, 1H), 7.67-7.63 (m, 2H), 7.59-7.54(m, 2H); <sup>13</sup>C NMR (100 MHz, CDCl<sub>3</sub>, ppm) δ 183.8, 154.5, 151.9, 137.4, 132.7, 130.5, 130.1, 129.4, 129.1, 128.5, 128.2, 127.4, 125.5, 123.3, 122.9, 115.5, 112.8; MS (EI) *m/z* (%) 272 (100), 195, 139, 105, 77; HRMS calcd. for: C<sub>19</sub>H<sub>13</sub>O<sub>2</sub> [M+H]<sup>+</sup> = 273.0916, found = 273.0910.

### Furo[3,2-b]pyridin-2-yl(phenyl)methanone (**3x**)<sup>[12]</sup>

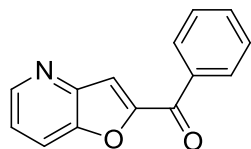

The reaction was conducted with 2-chloropyridin-3-ol (**1o**, 25.9 mg, 0.2 mmol), paraformaldehyde (15.0 mg, 0.5 mmol) and 2-bromo-1-phenylethanone (**2a**, 60 mg, 0.3 mmol). The residue was purified by column chromatography (silica gel, petroleum ether/ethyl acetate = 4:1) to give **3x** as white solid; yield 32%.

<sup>1</sup>H NMR (400 MHz, CDCl<sub>3</sub>, ppm) δ 8.72-8.71 (m, 1H), 8.06 (d, *J* = 8.0 Hz, 2H), 7.95 (d, *J* = 8.0 Hz, 1H), 7.70-7.66 (m, 2H), 7.59-7.55 (m, 2H), 7.45-7.42 (m, 1H); <sup>13</sup>C NMR (100 MHz, CDCl<sub>3</sub>, ppm) δ 184.1, 154.4, 149.4, 147.9, 146.2, 136.6, 133.4, 129.5, 128.7, 122.3, 119.8, 116.5; MS (EI) *m/z* (%) 223, 207, 146, 105 (100), 77.

When 2-bromopyridin-3-ol (**1p**, 34.8 mg, 0.2 mmol) was used, the reaction yield for **3x** is 70%.

When 2-iodopyridin-3-ol (**1q**, 44.2 mg, 0.2 mmol) was used, the reaction yield for **3x** is 72%.

### [1,1'-Biphenyl]-4-yl(5-phenylbenzofuran-2-yl)methanone (**3y**, 1370015-91-0)<sup>[13]</sup>

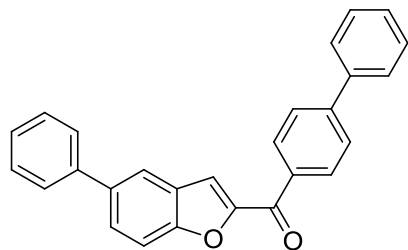

The reaction was conducted with 3-bromo-[1,1'-biphenyl]-4-ol (**1i**, 49.8 mg, 0.2 mmol), paraformaldehyde (15.0 mg, 0.5 mmol) and 1-([1,1'-biphenyl]-4-yl)-2-bromoethanone (**2c**, 82.5 mg, 0.3 mmol). The residue was purified by column chromatography (silica gel, petroleum ether/ethyl acetate = 40:1) to give **3y** as white solid; yield 65%.

$^1\text{H}$  NMR (400 MHz,  $\text{CDCl}_3$ , ppm)  $\delta$  8.18 (d,  $J = 8.0$  Hz, 2H), 7.92 (s, 1H), 7.79-7.77 (m, 2H), 7.74-7.73 (m, 1H), 7.69-7.67 (m, 2H), 7.64-7.62 (m, 3H), 7.52-7.36 (m, 7H);  $^{13}\text{C}$  NMR (100 MHz,  $\text{CDCl}_3$ , ppm)  $\delta$  183.7, 155.5, 153.0, 145.8, 140.8, 139.8, 137.8, 135.8, 130.1, 129.0, 128.9, 128.3, 128.2, 127.6, 127.4, 127.3, 127.2, 121.5, 116.4, 112.7; HRMS calcd. for:  $\text{C}_{27}\text{H}_{19}\text{O}_2$   $[\text{M}+\text{H}]^+$  = 375.1385, found = 375.1378.

## Reference

1. Pfizer Inc., Patent, WO2004/74270 A2, **2004**.
2. Fuchs, A.; Baur, R.; Schoeder, C.; Sigel, E.; Müller, C. E. *Bioorg. Med. Chem.* **2014**, *22*, 6908.
3. Peese, K.; Wang, Z. Y.; Kadow, J. F.; Sivaprakasam, P.; Naidu, B. N. Patent, US2015/232480 A1, **2015**.
4. Wagle, D.; Fang, S.; Rho; Taikyun, E.; John J.; Vasan, S.; Ulrich, P. Patent, US6121300 A1, **2000**.
5. Xu, W. G.; Li, Q. C.; Cao, C. P.; Zhang, F. L.; Zheng, H. *Org. Biomol. Chem.* **2015**, *13*, 6158.
6. Yahiaoui, S.; Peuchmaur, M.; Boumendjel, A. *Tetrahedron* **2011**, *67*, 7703.
7. Pautus, S.; Yee, S. W.; Jayne, M.; Coogan, M. P.; Simons, C. *Bioorg. Med. Chem.* **2006**, *14*, 3643.
8. Carpenter, L.; Clarke, M. L. *Synlett* **2011**, 65.
9. Shen, Z.; Dornan, P.; Khan, H. A.; Woo, T. K.; Dong, V. M. *J. Am. Chem. Soc.* **2009**, *131*, 1077.
10. Stroba, A.; Schaeffer, F.; Hindies, V.; Lopez-carcia, L.; Adrican, I.; Froehner, W.; Hartmann, R. W.; Biondi, R. M.; Engel, M. *J. Med. Chem.* **2009**, *52*, 4683.

11. Salome, C.; Narbonne, V.; Ribeiro, N.; Thuaud, F.; Serova, M.; De G. A.; Faivre, S.; Raymond, E.; Desaubry, L. *Eur. J. Med. Chem.* **2014**, *74*, 41.
12. Carr, A.; Florent, J. C.; Bertounesque, E.; Rousselle, P. *Adv. Synth. Catal.* **2012**, *354*, 2751.
13. Aswathanarayanappa, C.; Bheemappa, E.; Bodke, Y. D.; Bhovi, V. K.; Ningegowda, Raghu; Shivakumar; Peethambar; Telkar, S. *Med. Chem. Res.* **2013**, *22*, 78.



# <sup>1</sup>H NMR and <sup>13</sup>C NMR spectra for all products

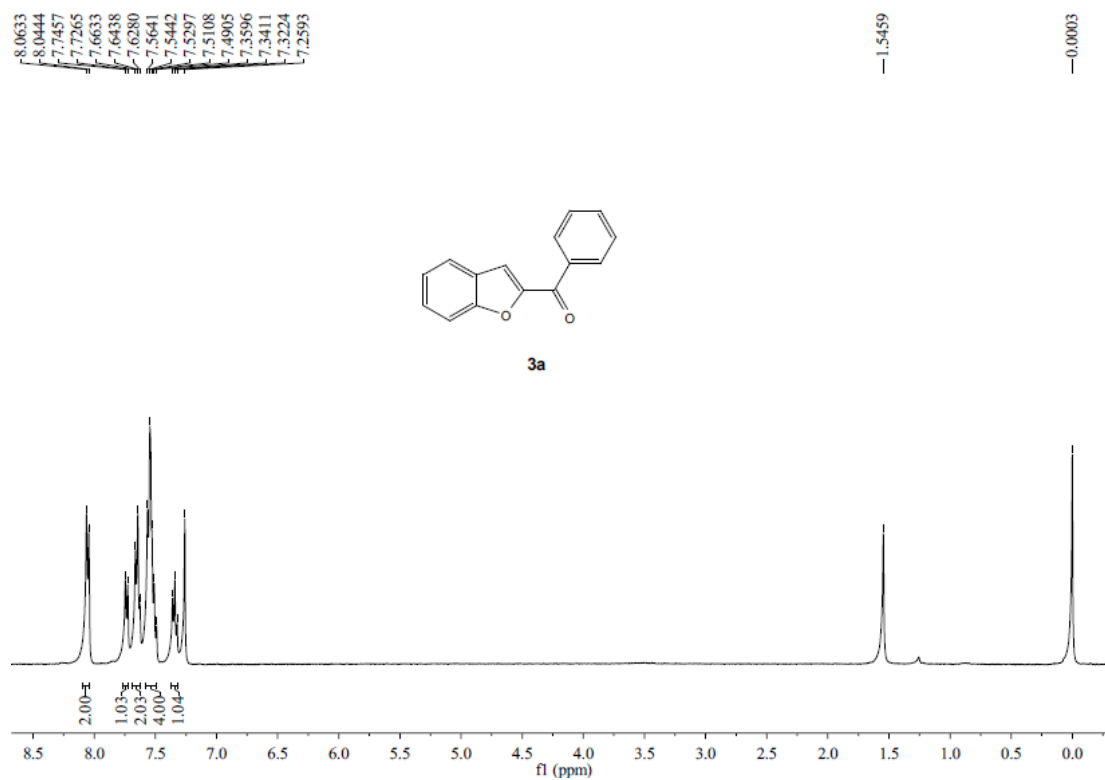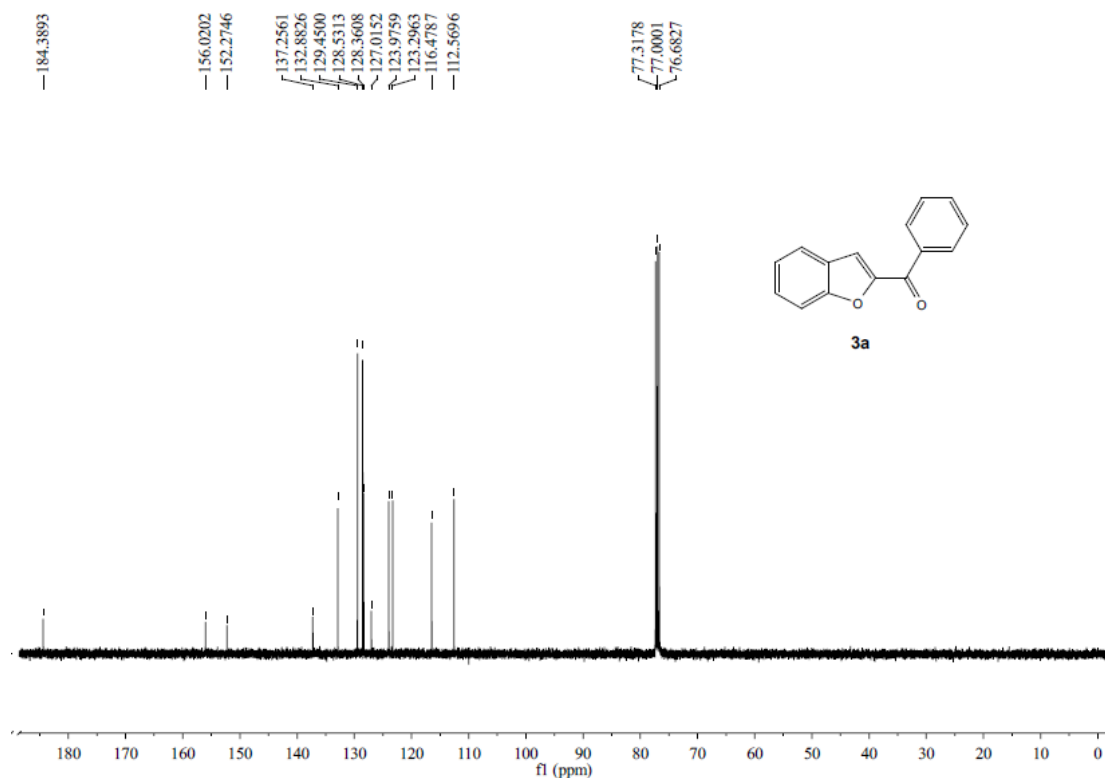

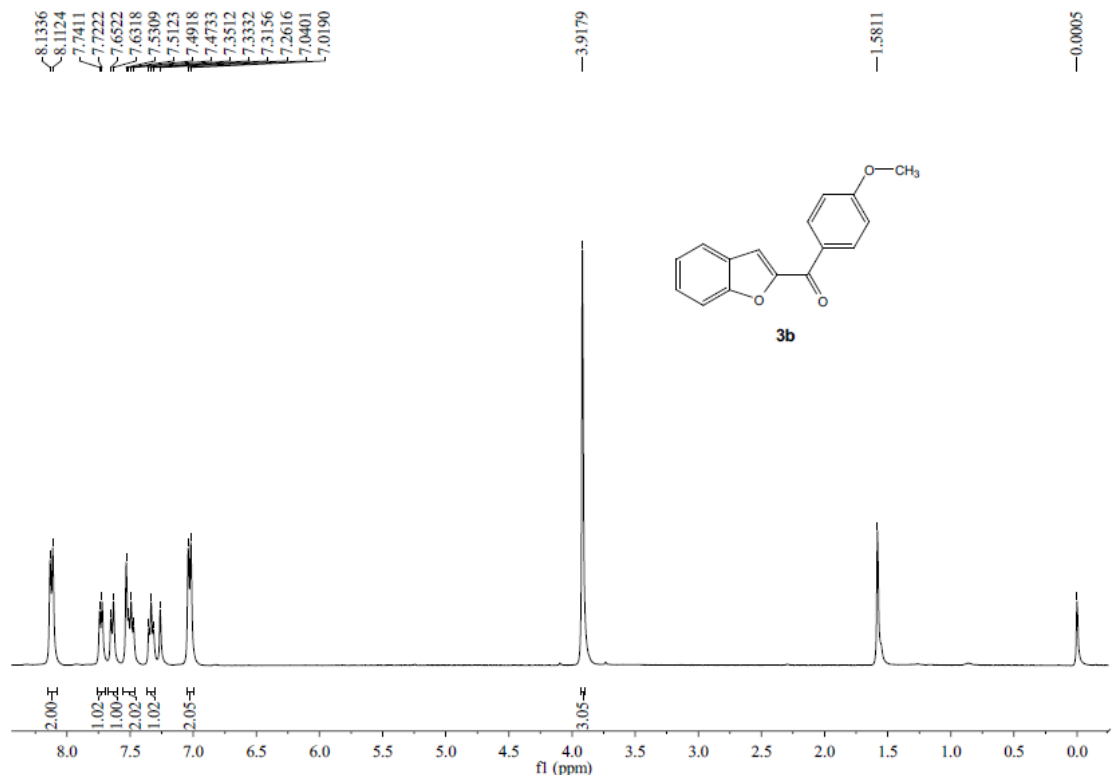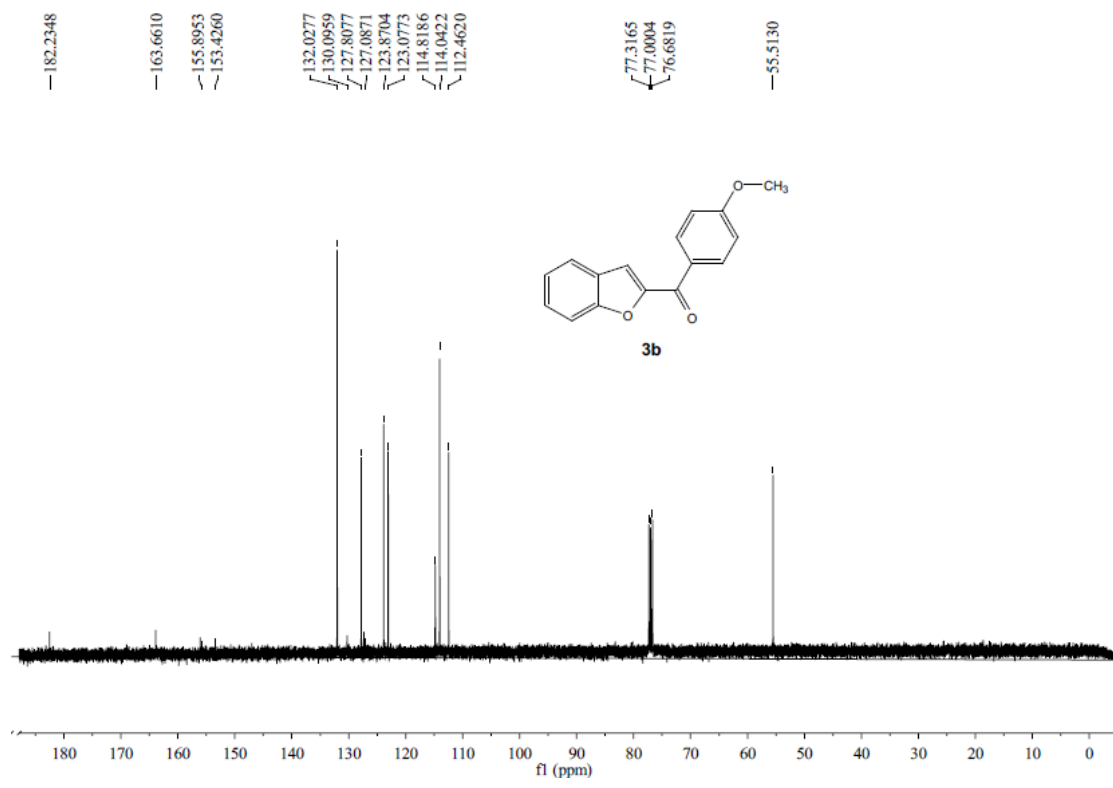

8.1707  
8.1502  
7.7795  
7.7596  
7.7428  
7.6845  
7.6663  
7.6568  
7.5940  
7.5357  
7.5186  
7.5010  
7.4825  
7.4431  
7.4249  
7.4069  
7.3689  
7.3501  
7.2582

1.5455

0.0003

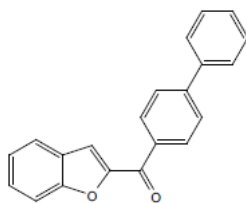

3c

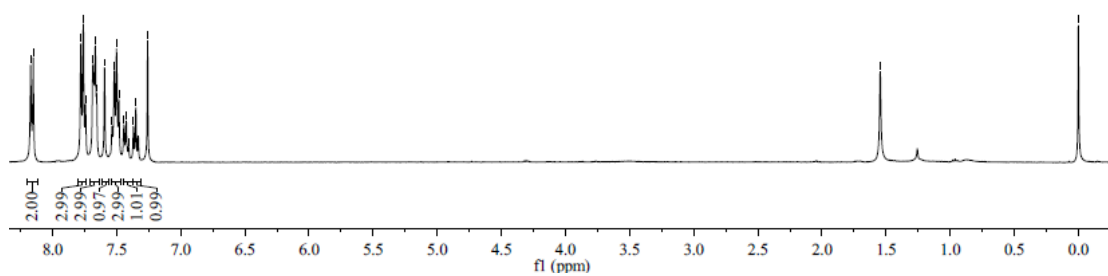

183.8325

156.0117

152.4753

135.8948

130.1302

128.9933

128.3214

128.2813

127.3112

127.2011

123.9874

118.2886

112.5686

77.3171

76.9997

76.6825

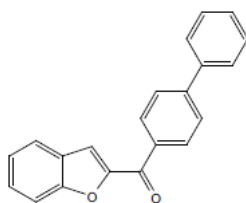

3c

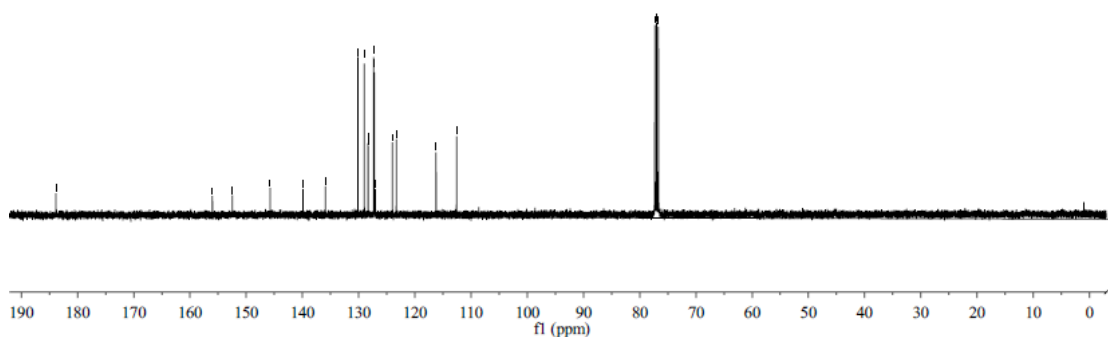

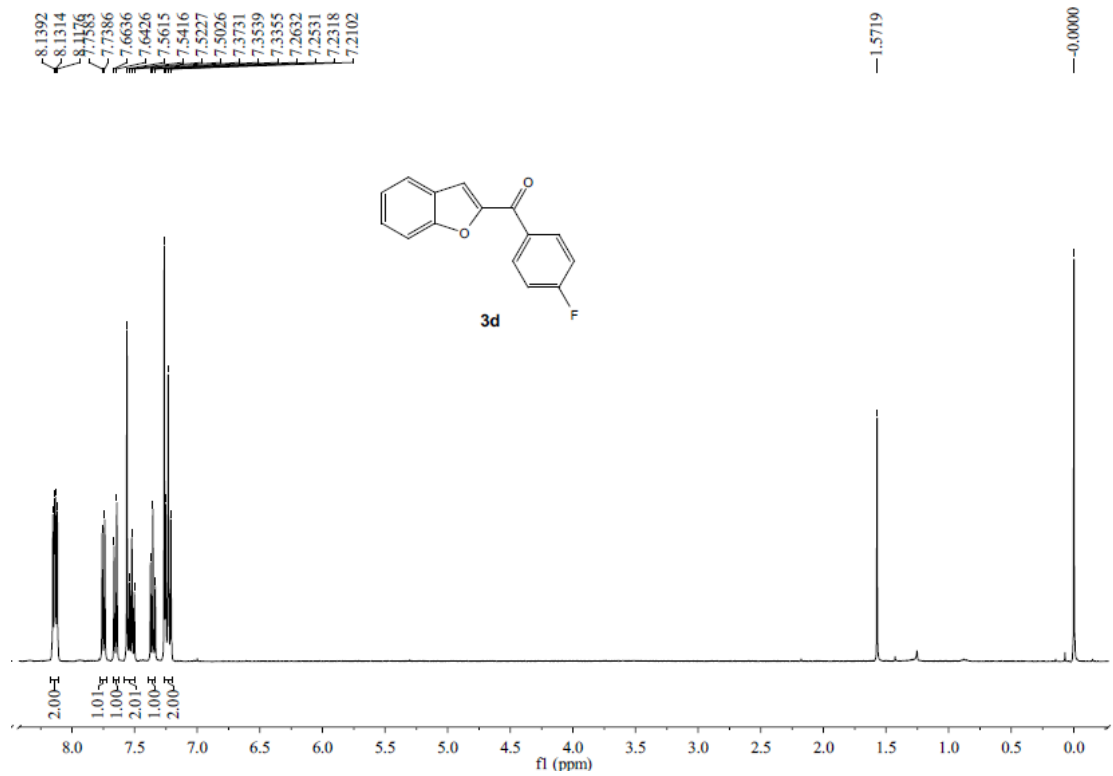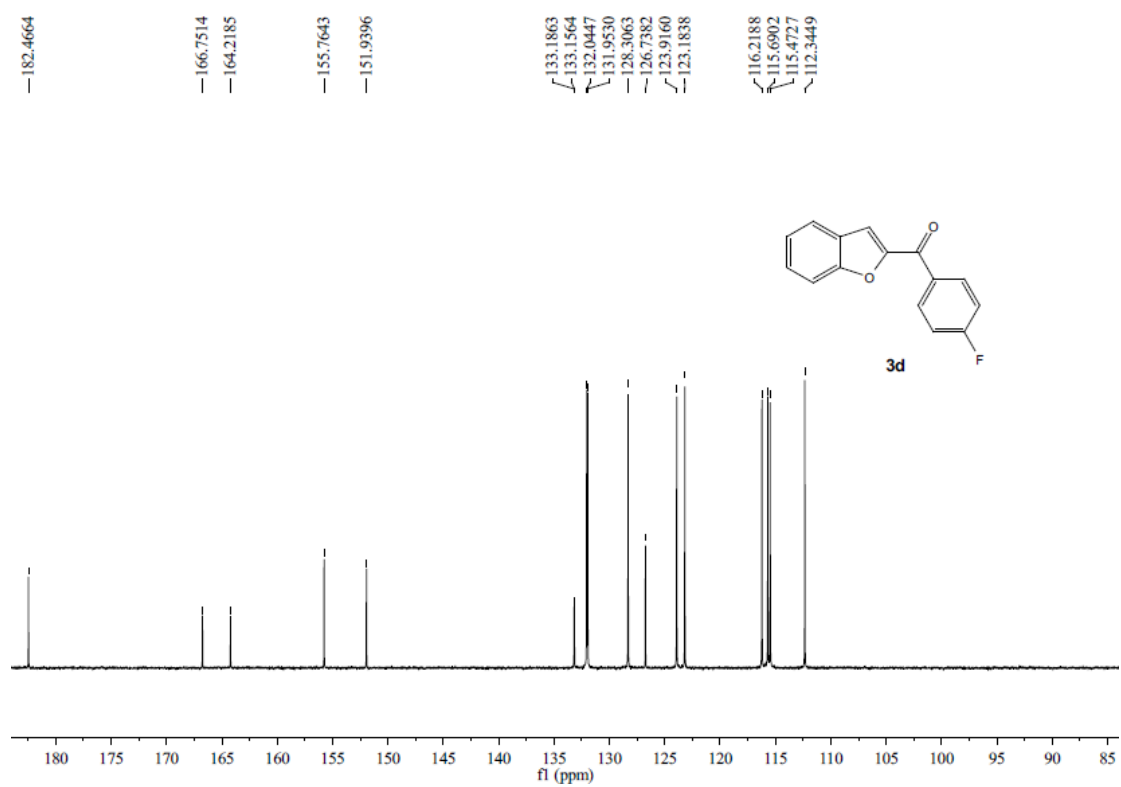

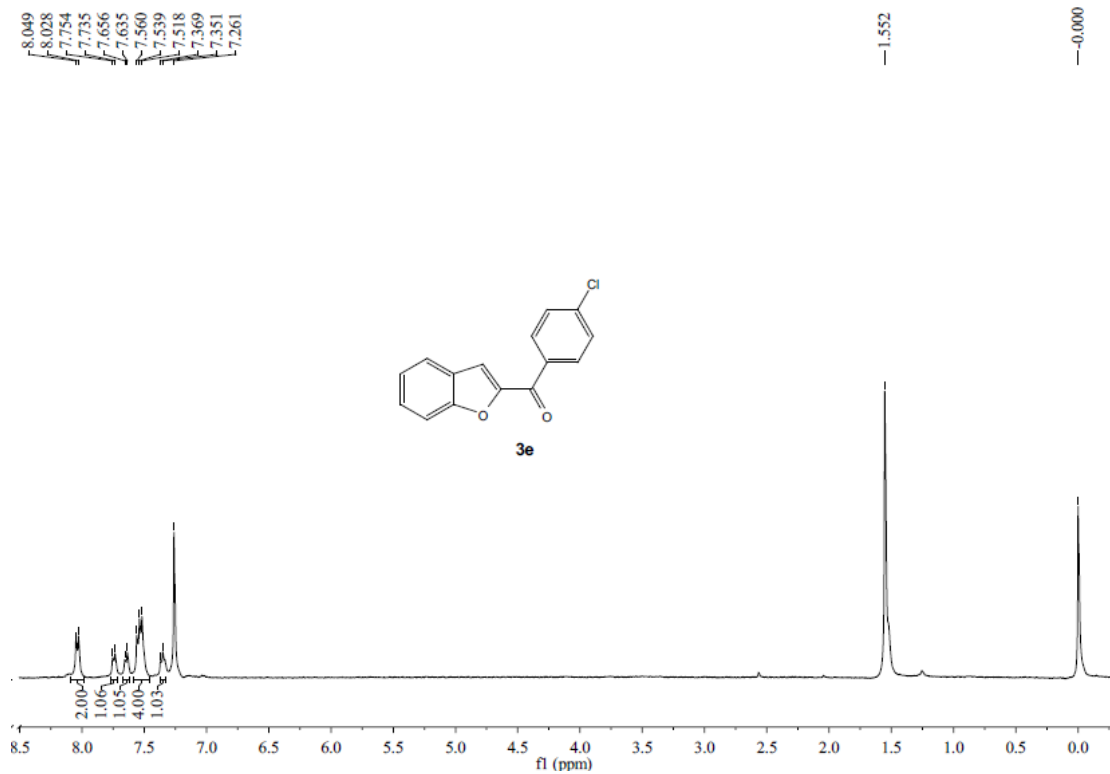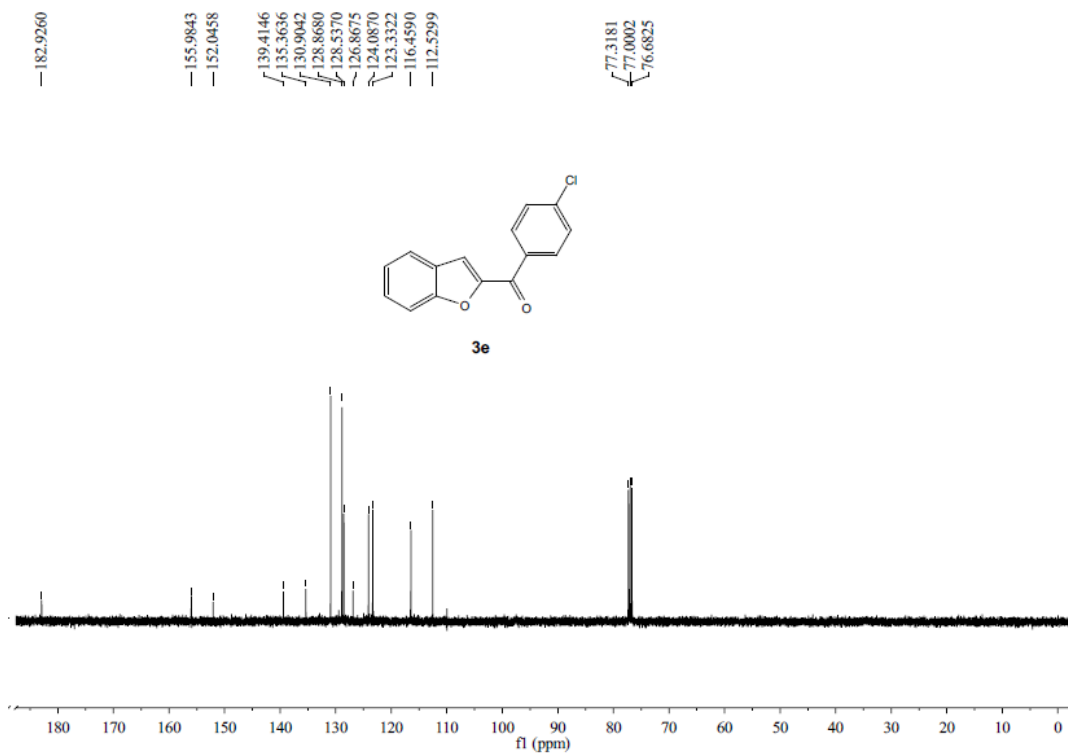

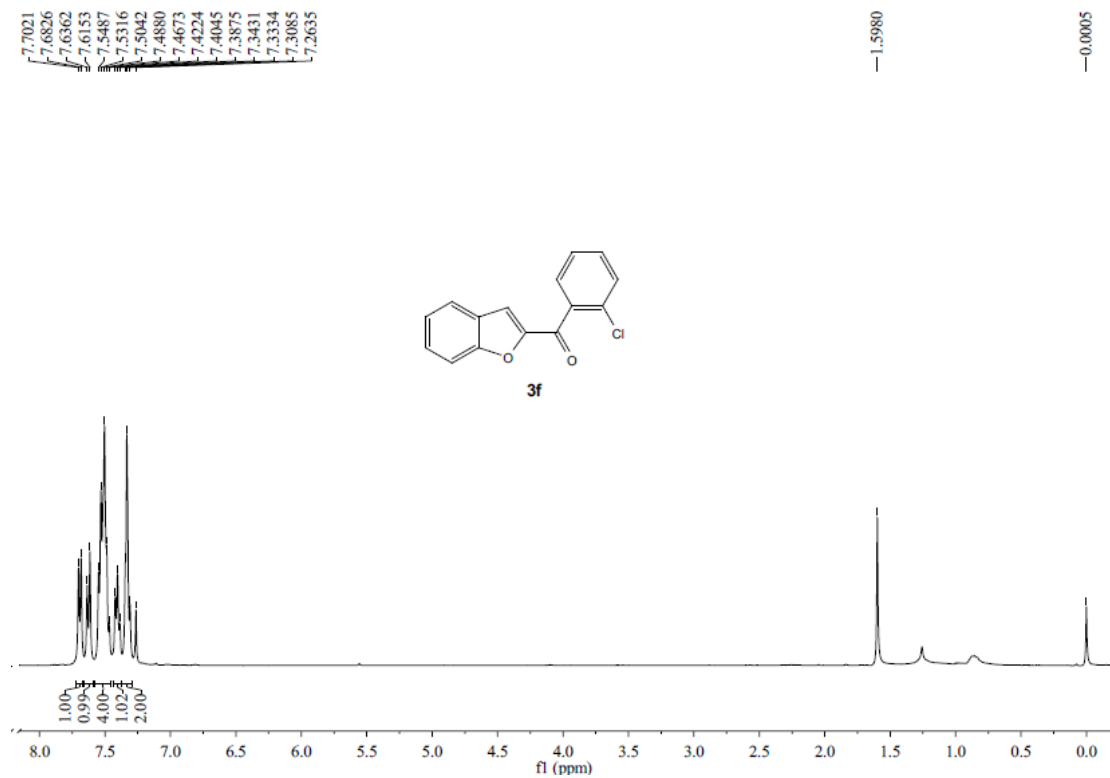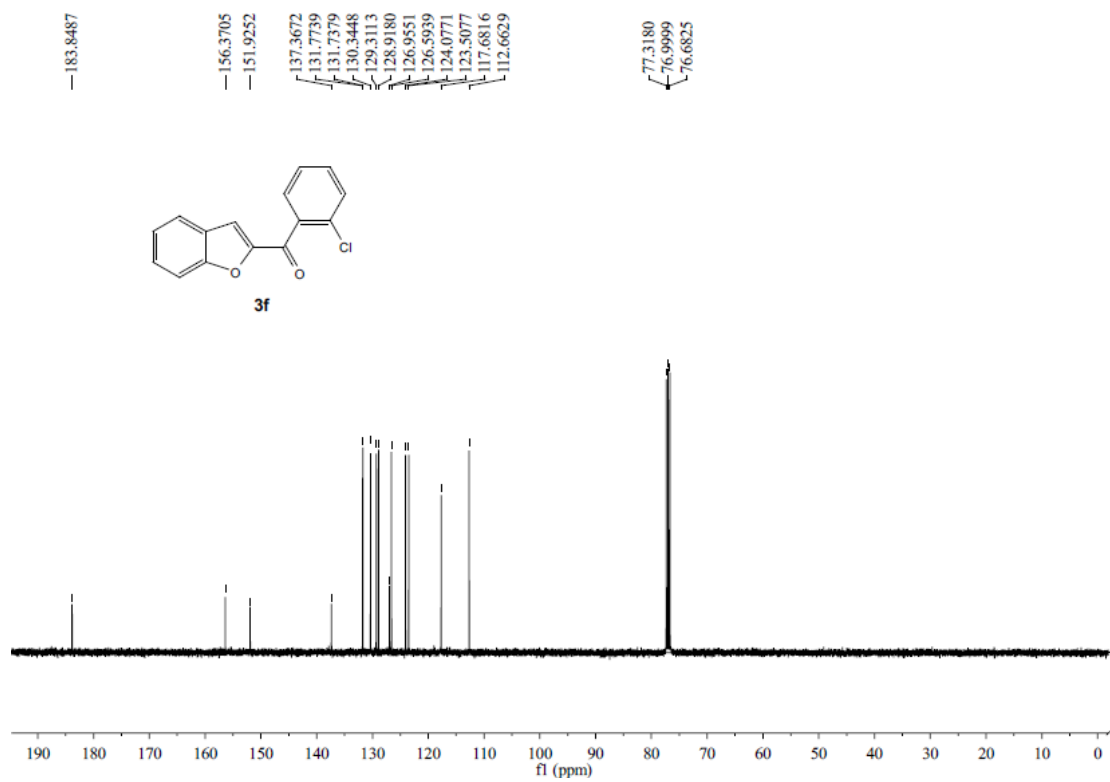

8.0357  
7.9591  
7.9399  
7.7621  
7.7425  
7.6670  
7.6460  
7.6255  
7.6056  
7.5697  
7.5478  
7.5288  
7.5107  
7.4915  
7.4718  
7.3745  
7.3558  
7.3370  
7.2613

-1.5903

-0.0004

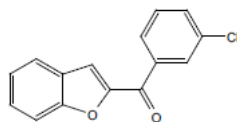

**3g**

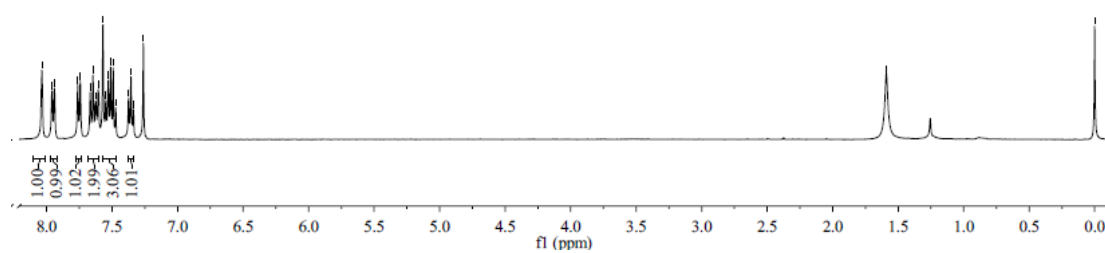

-182.7858

-156.1137

-151.8718

138.6997

134.7986

132.8362

129.8695

129.4490

128.6779

127.5609

126.8844

124.1450

123.4101

116.8150

112.6024

77.3168

76.9999

76.6824

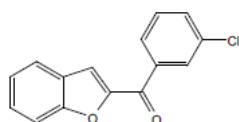

**3g**

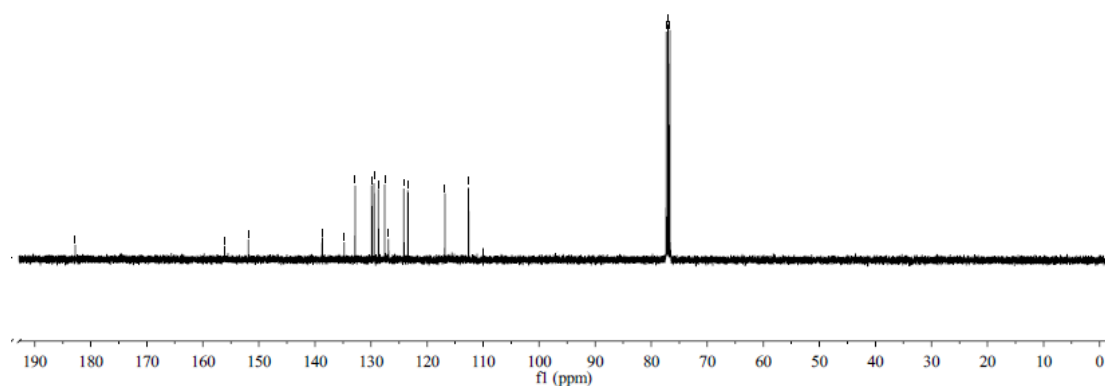

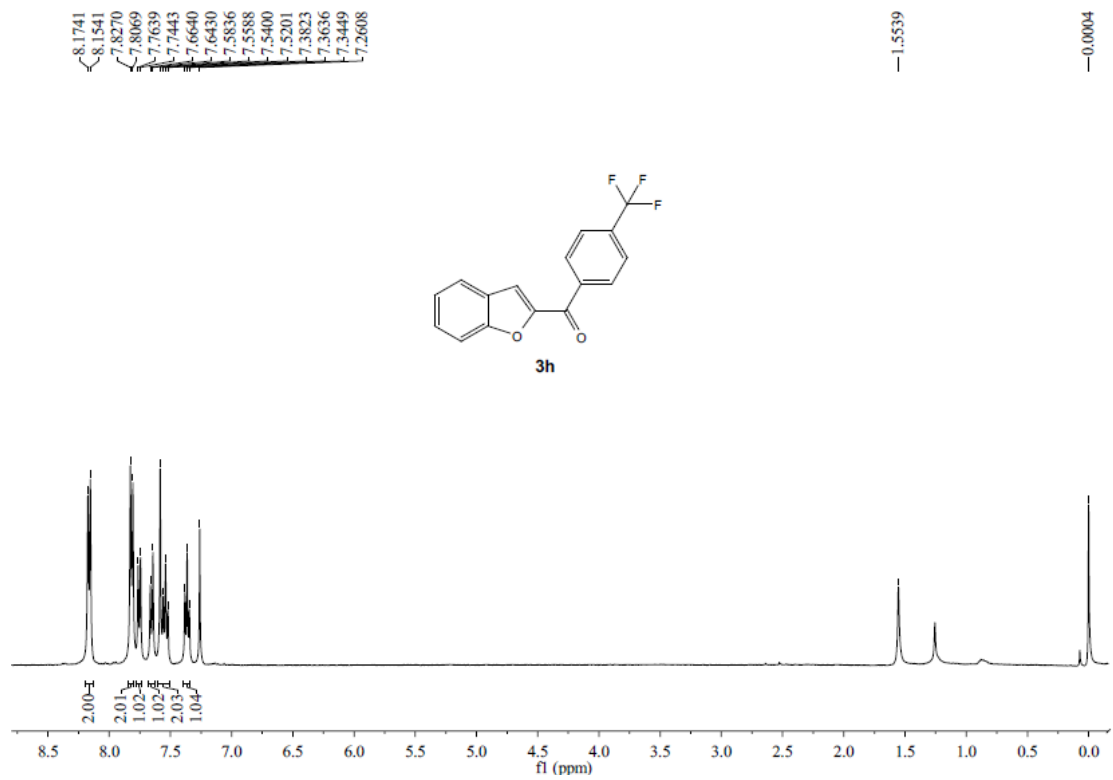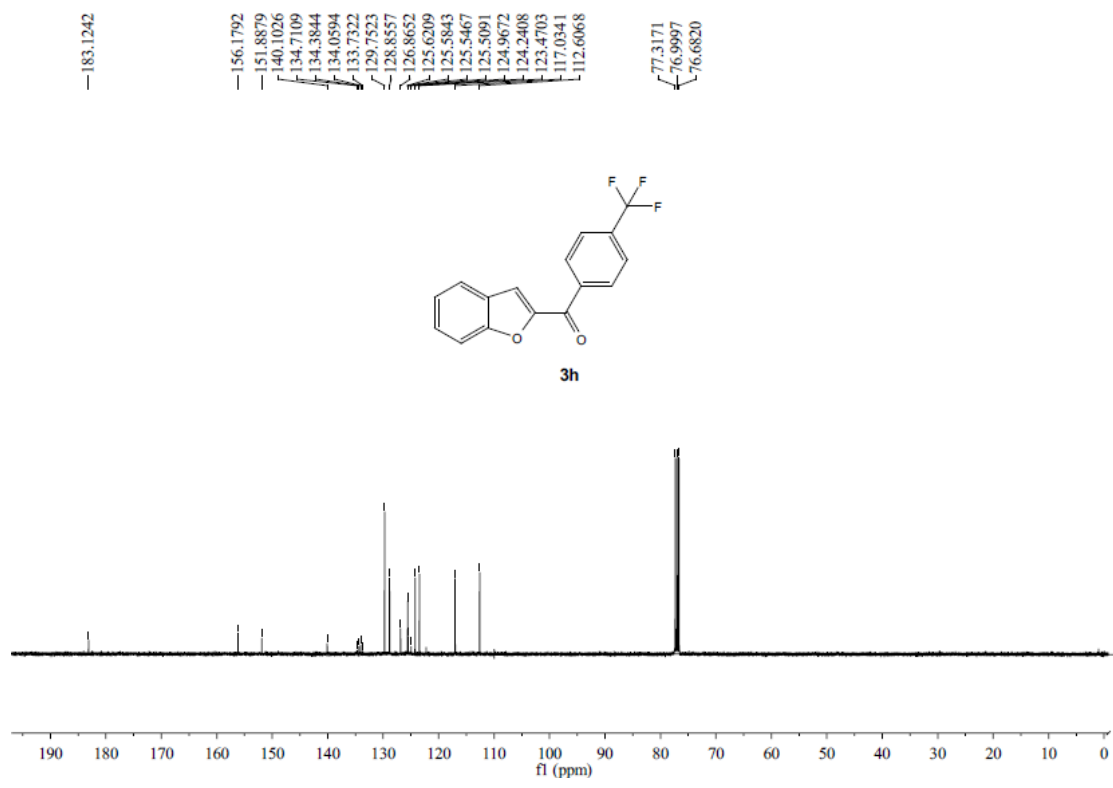



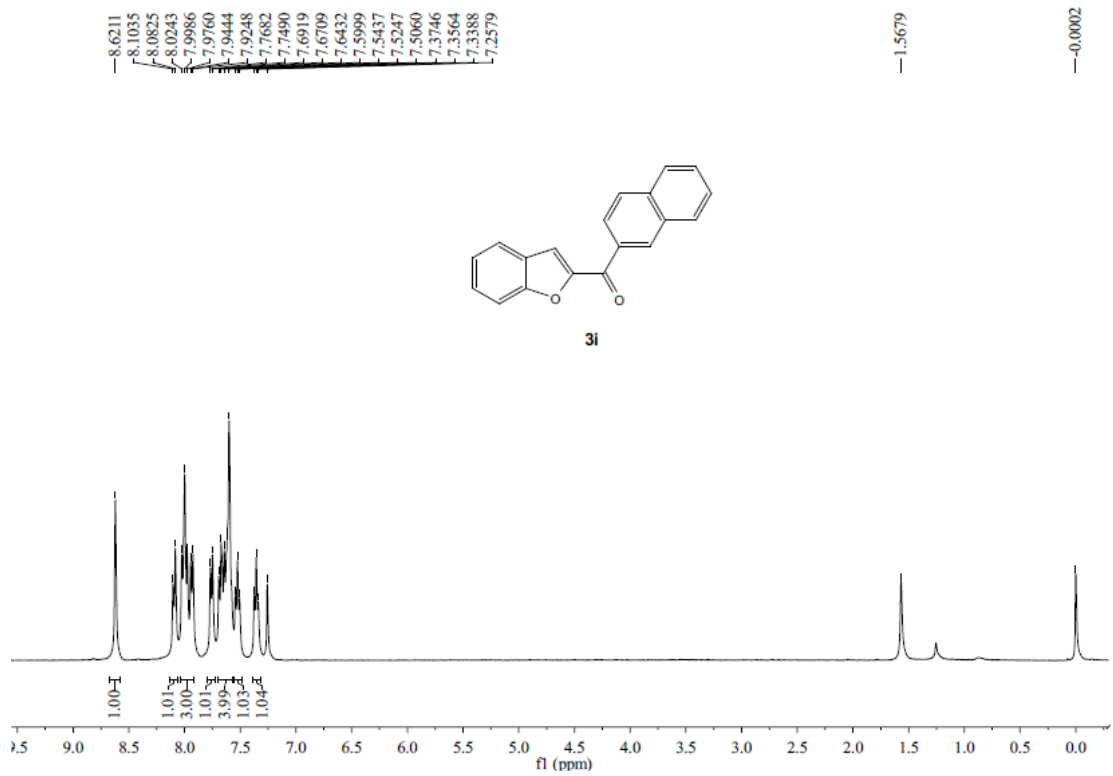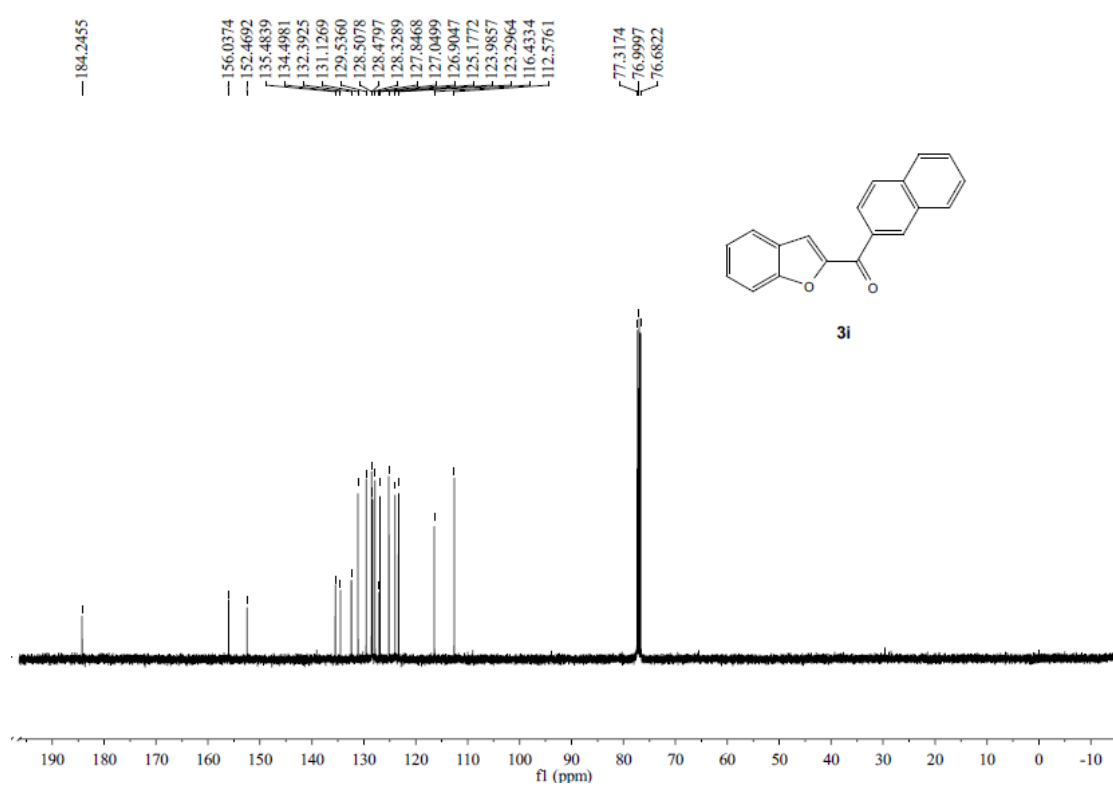

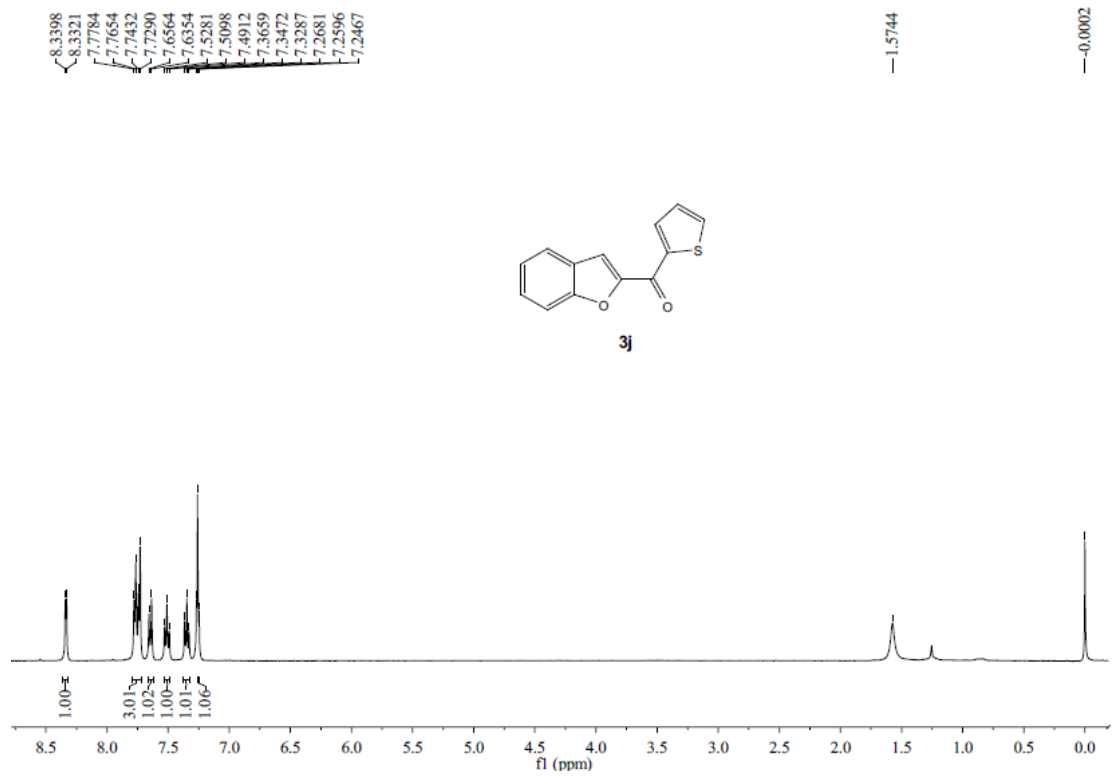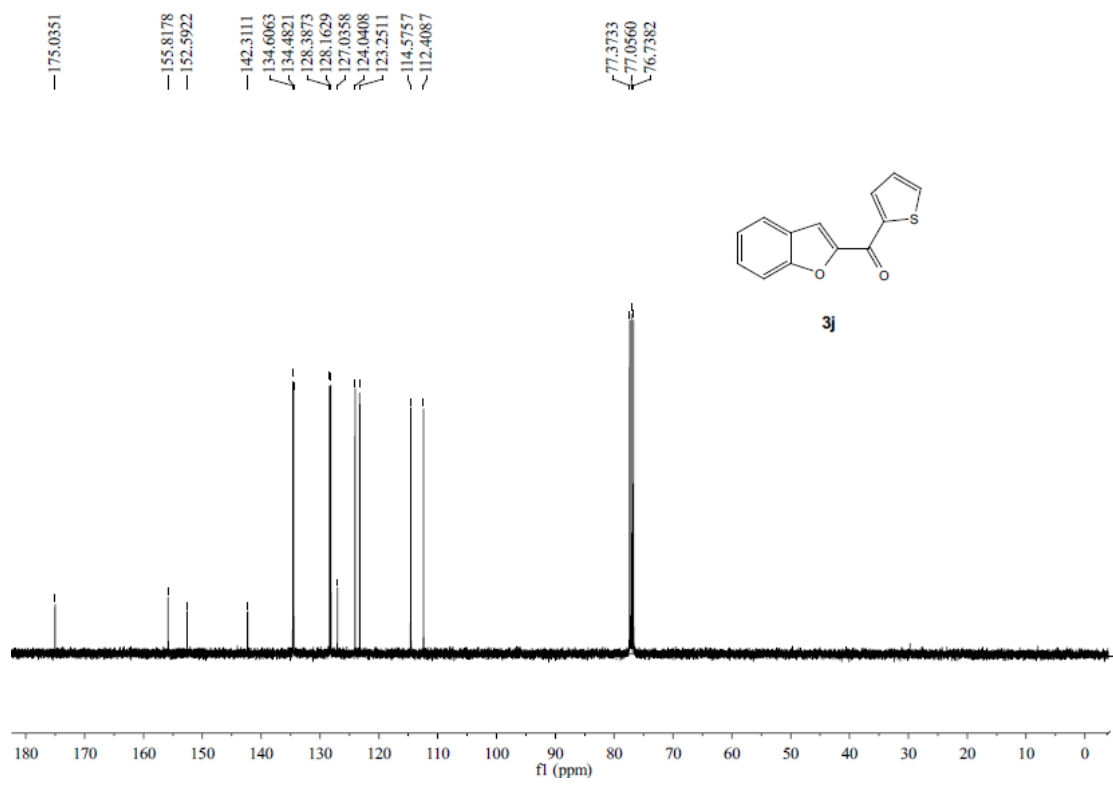

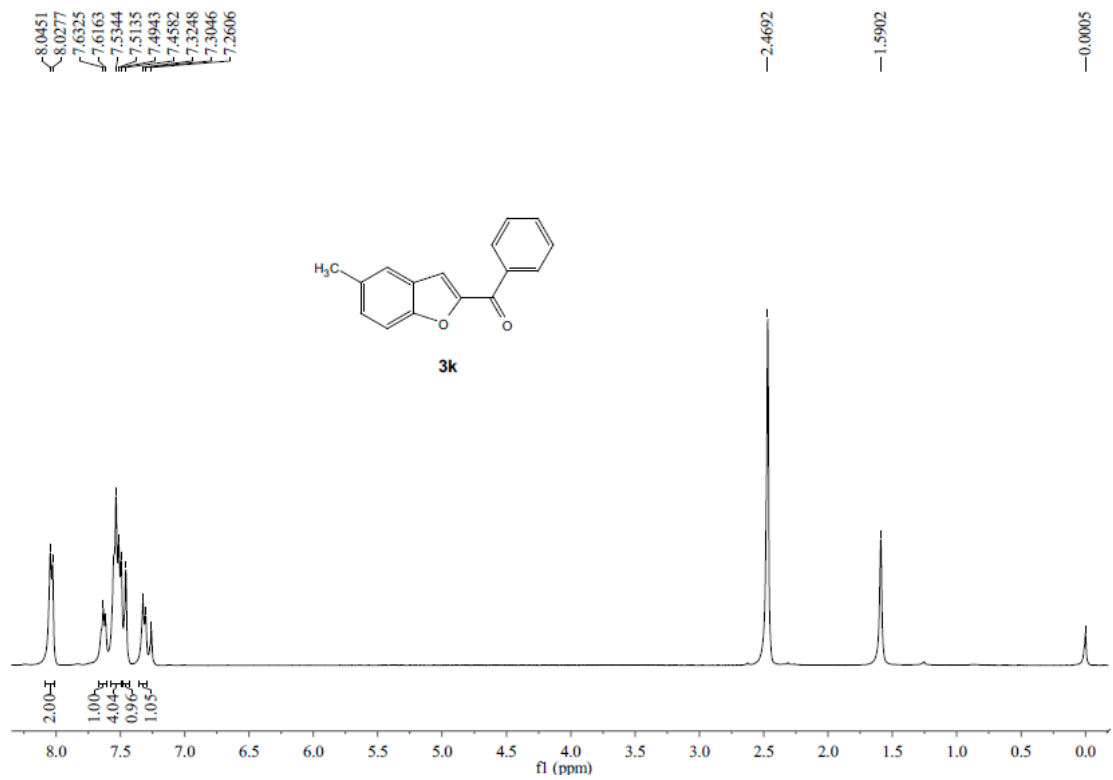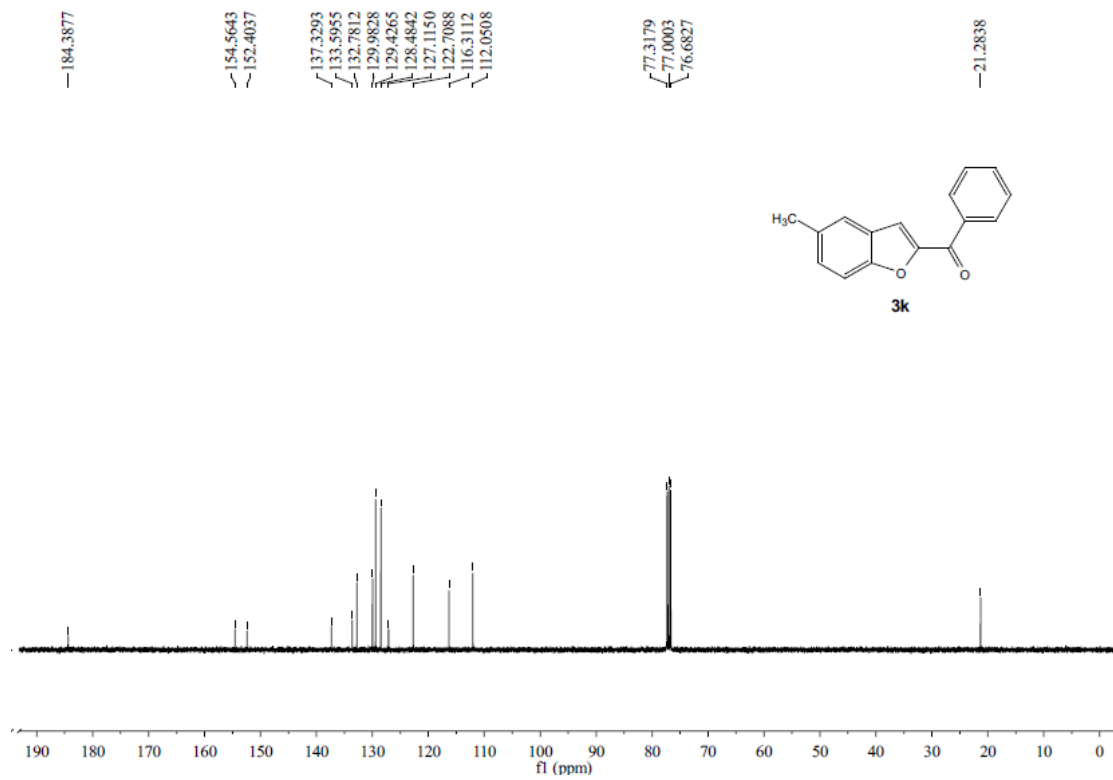

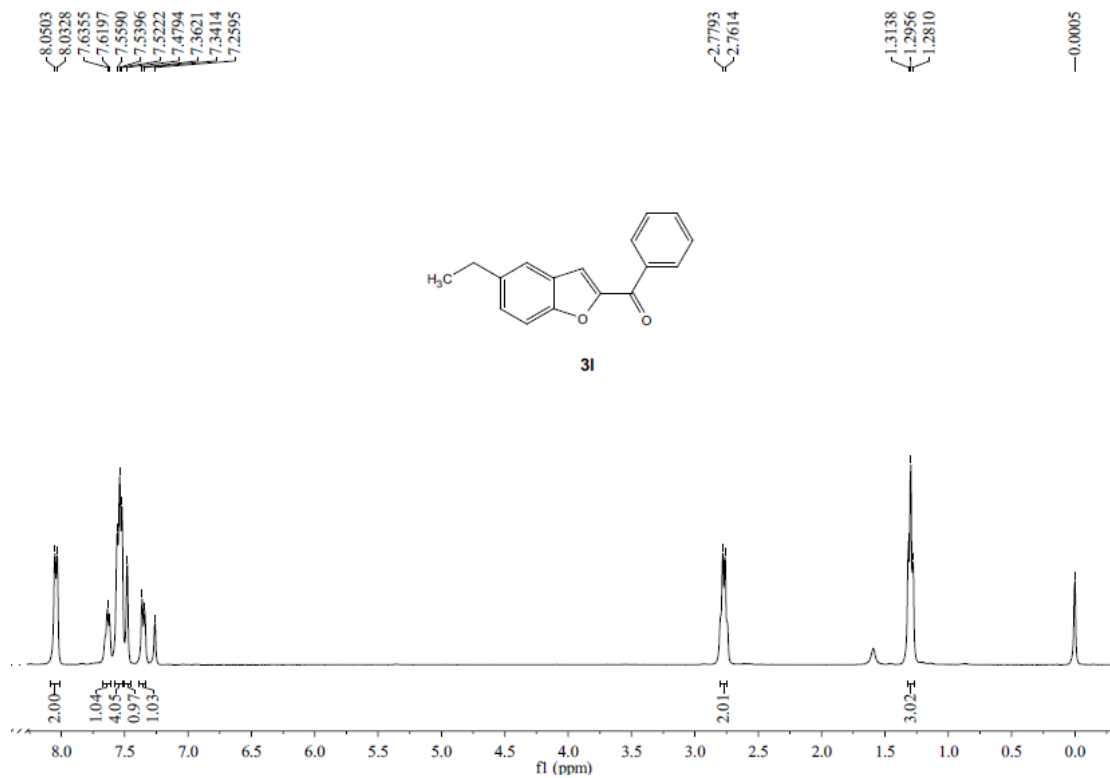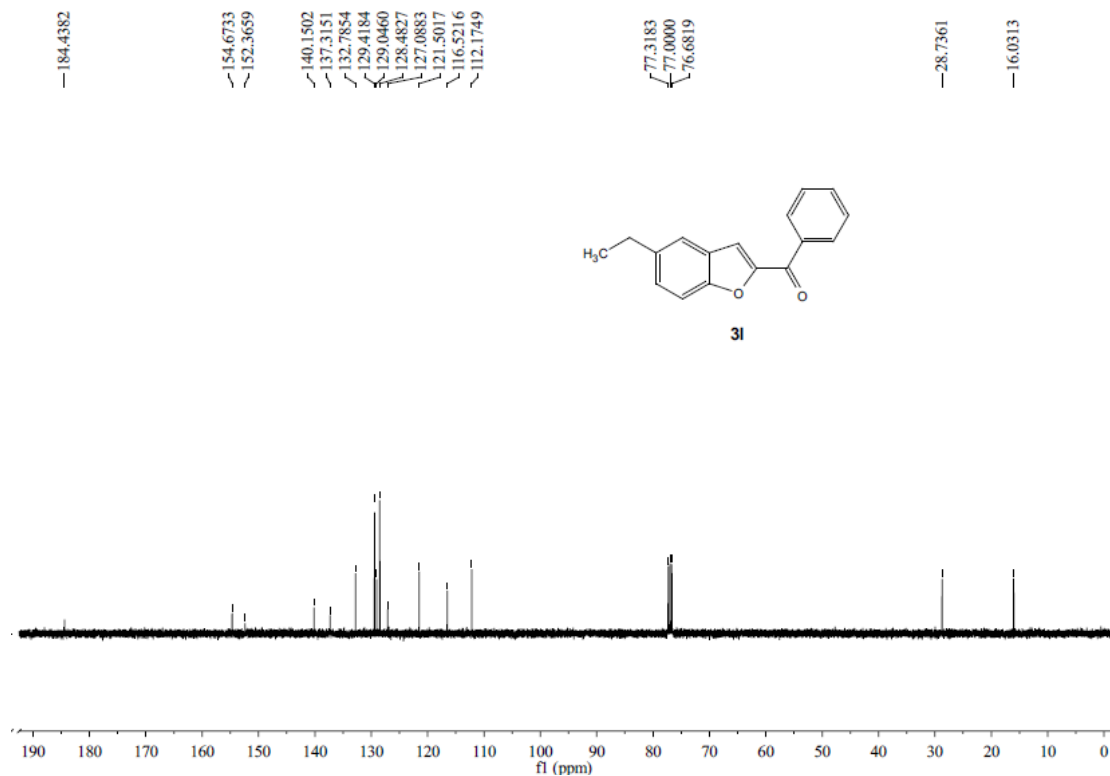

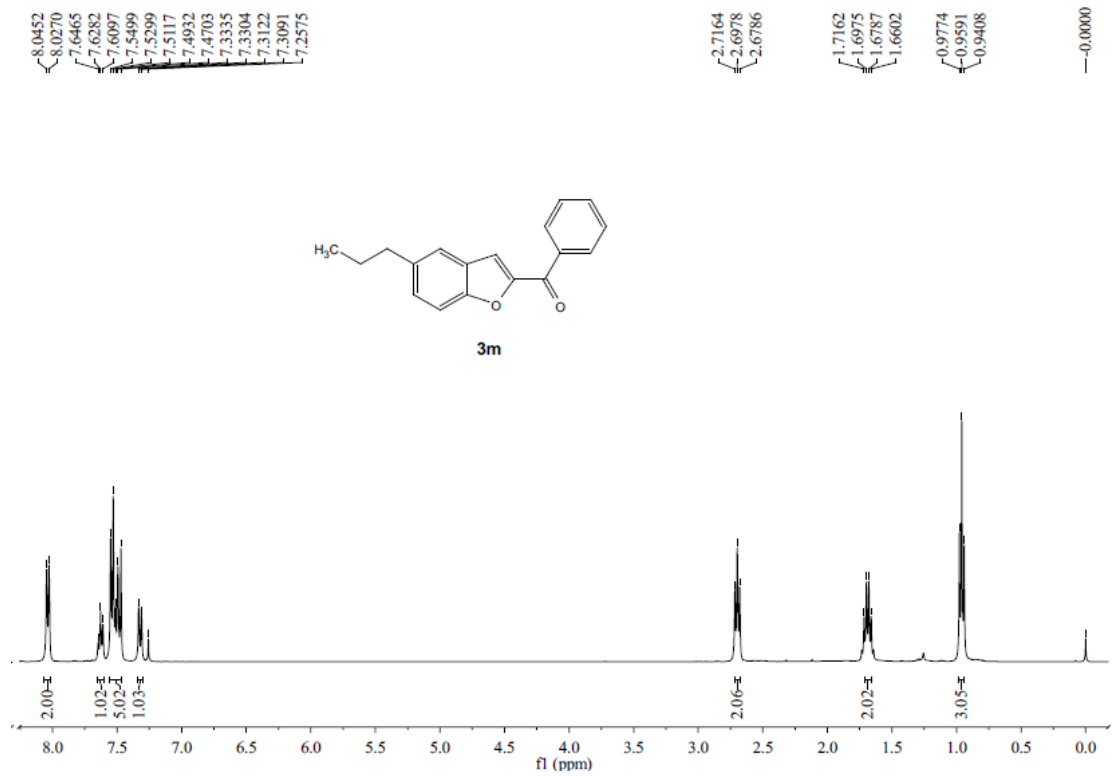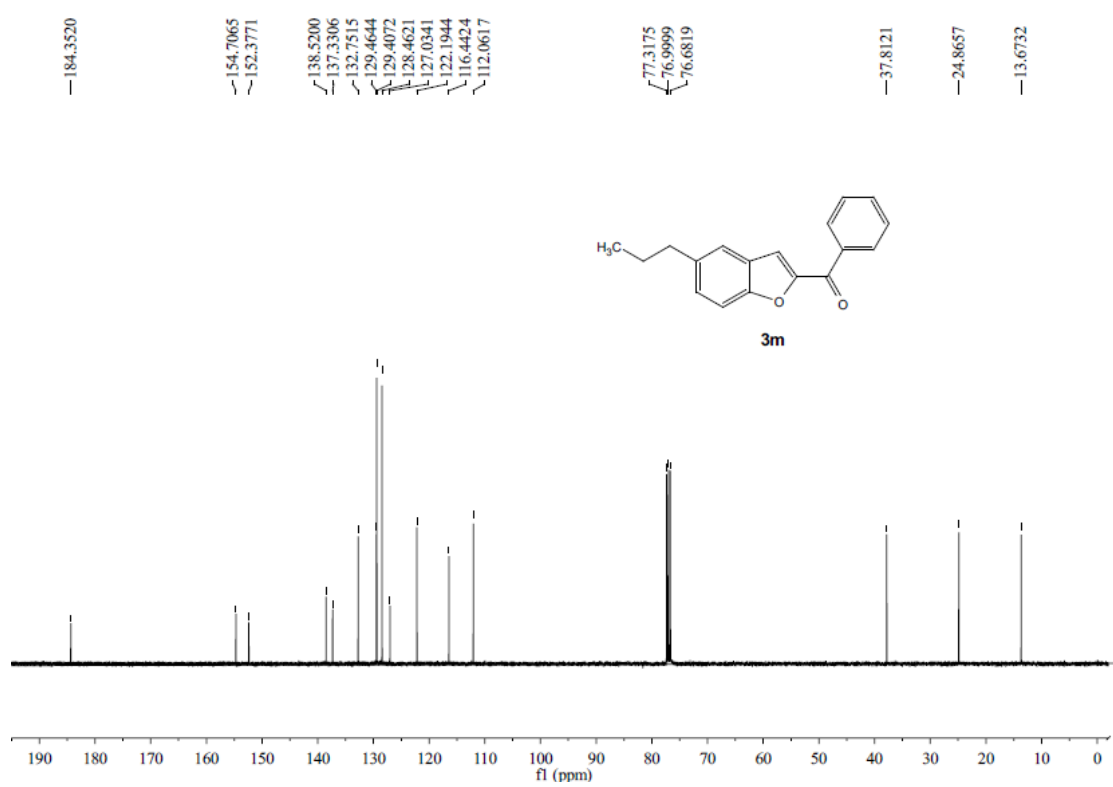

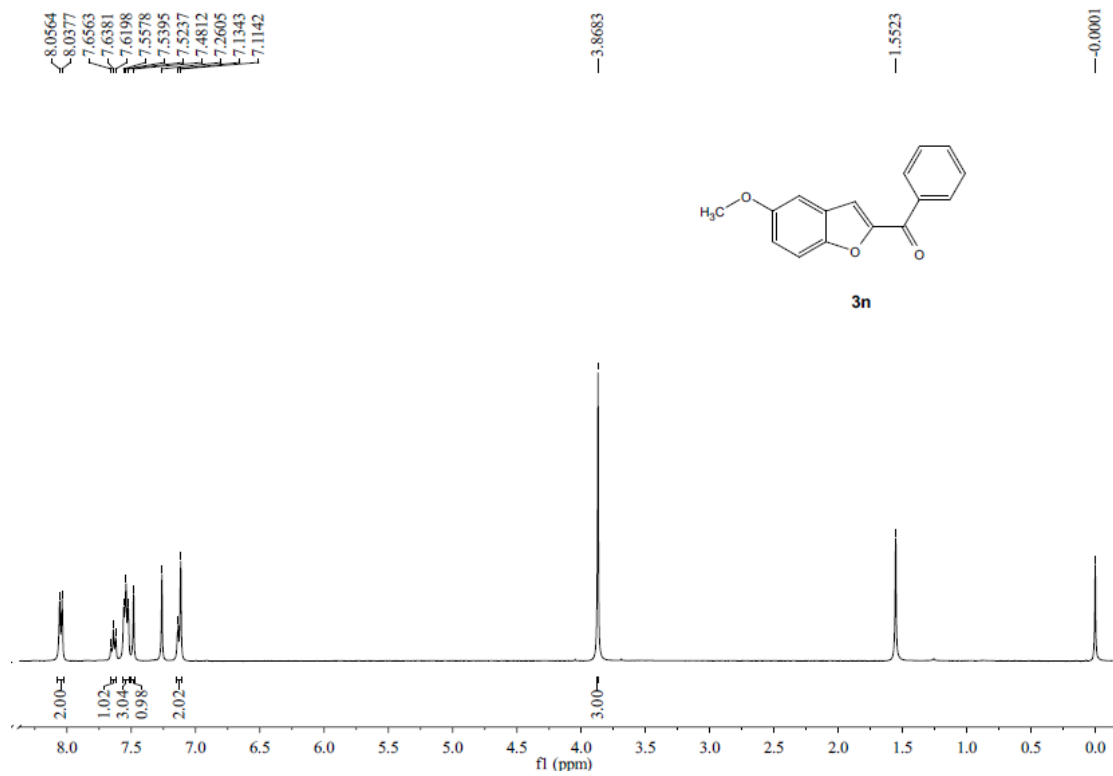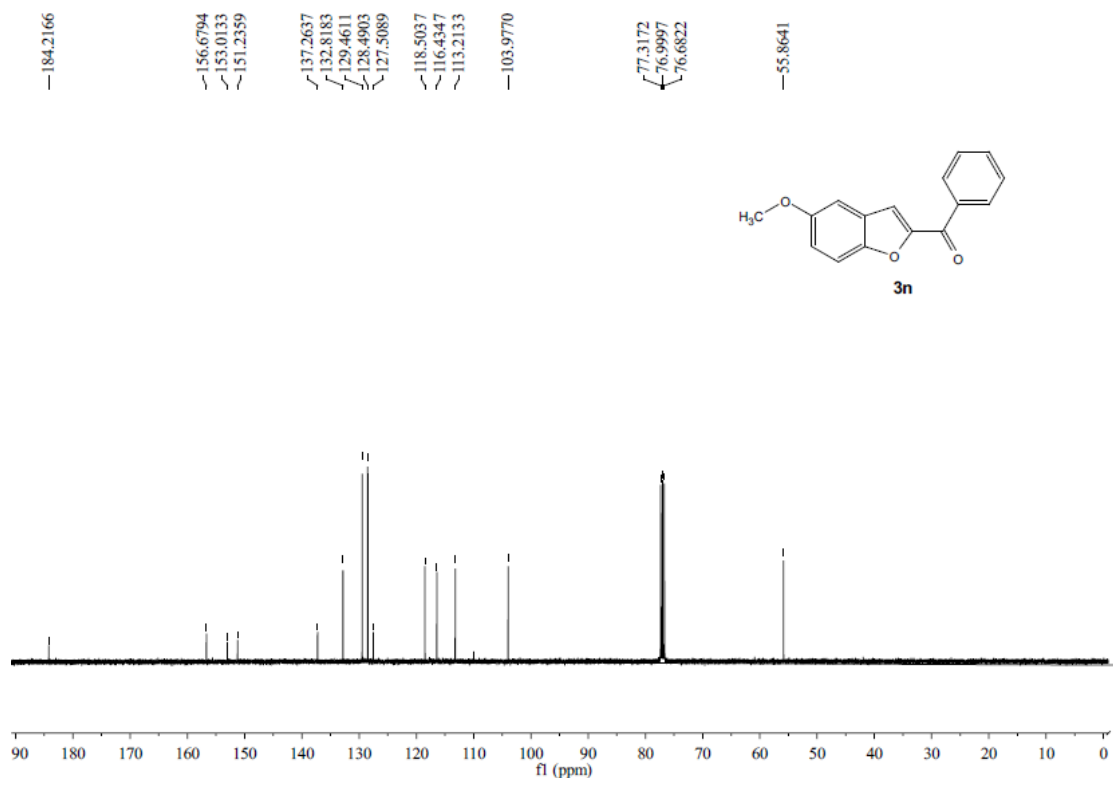

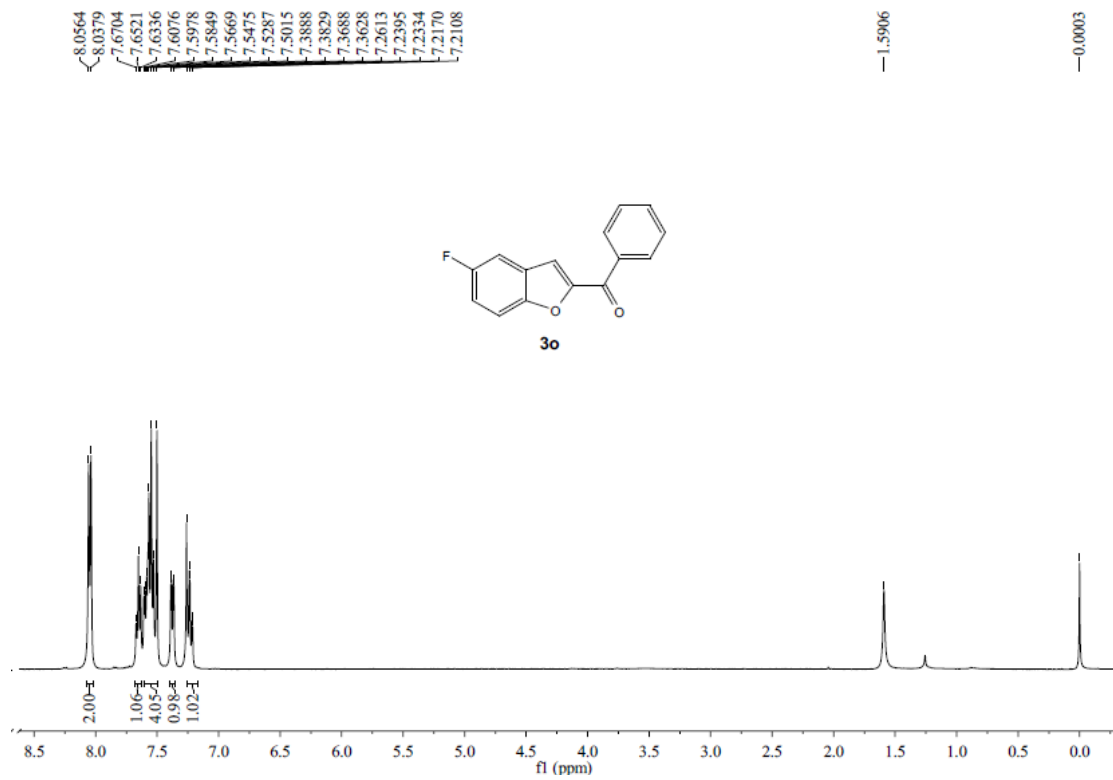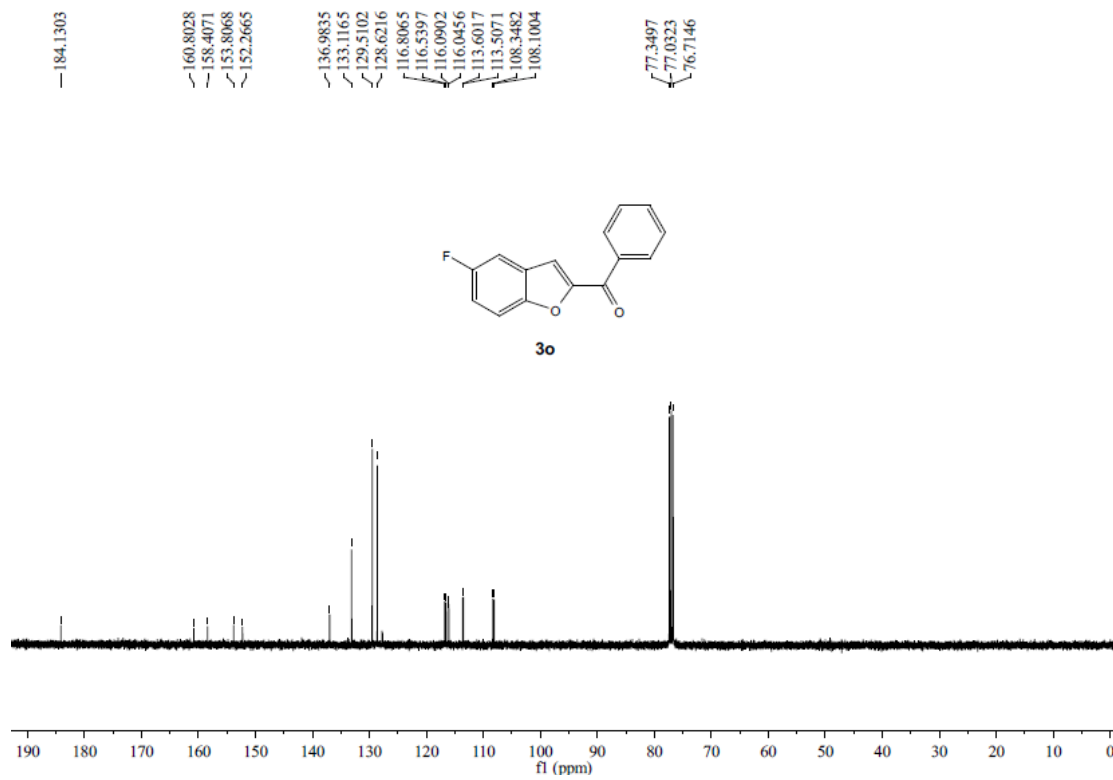

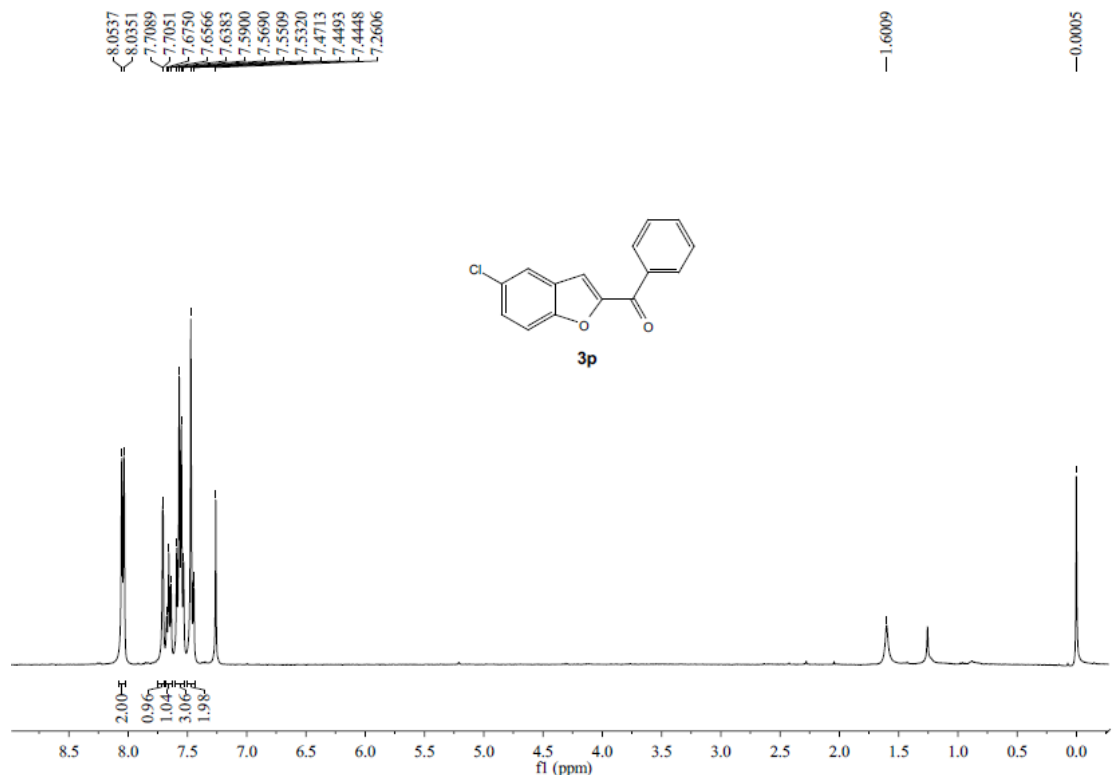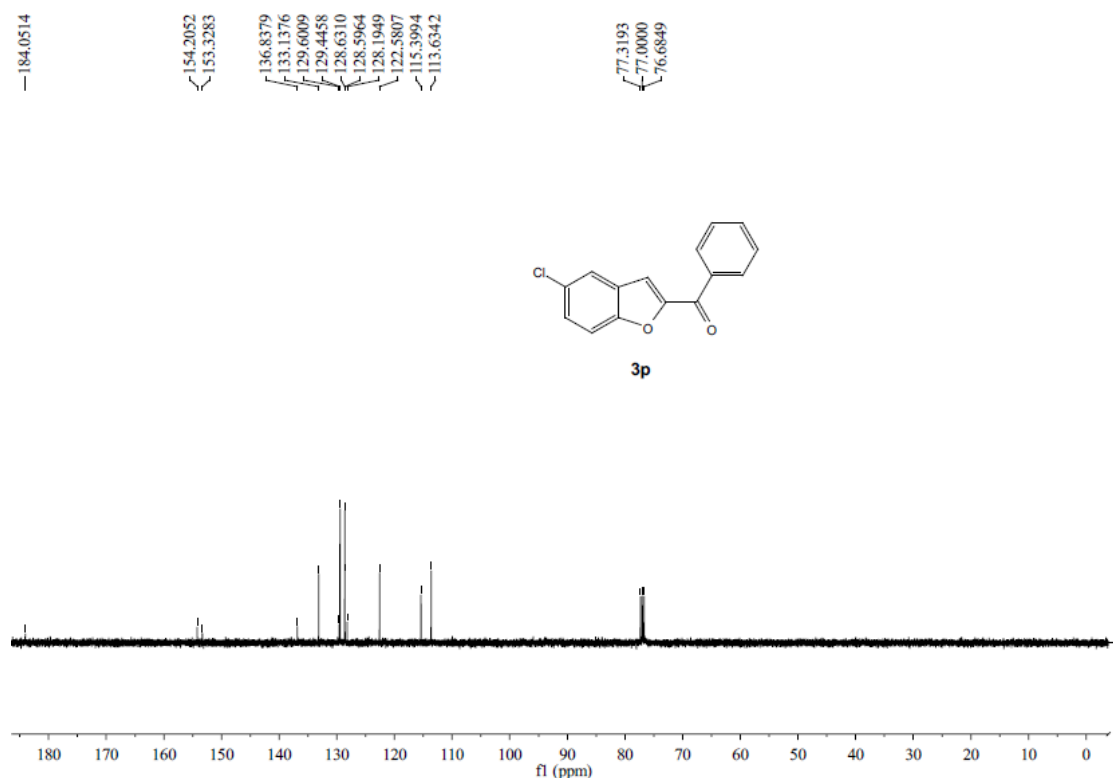



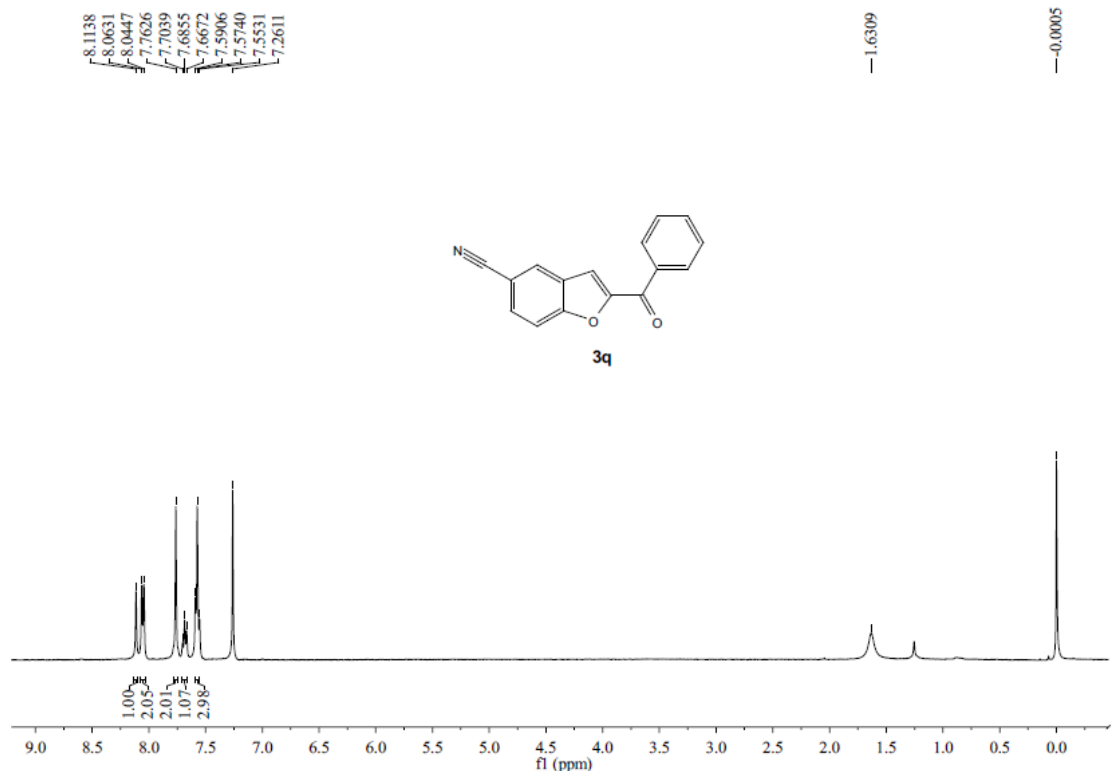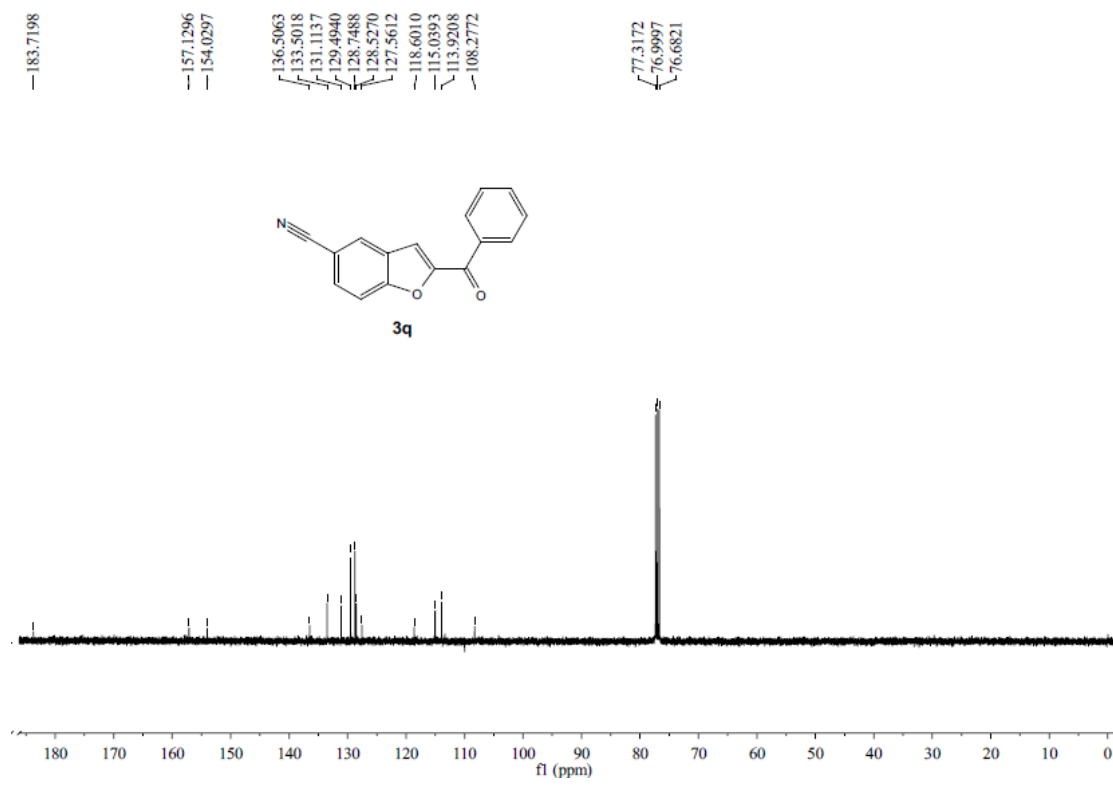

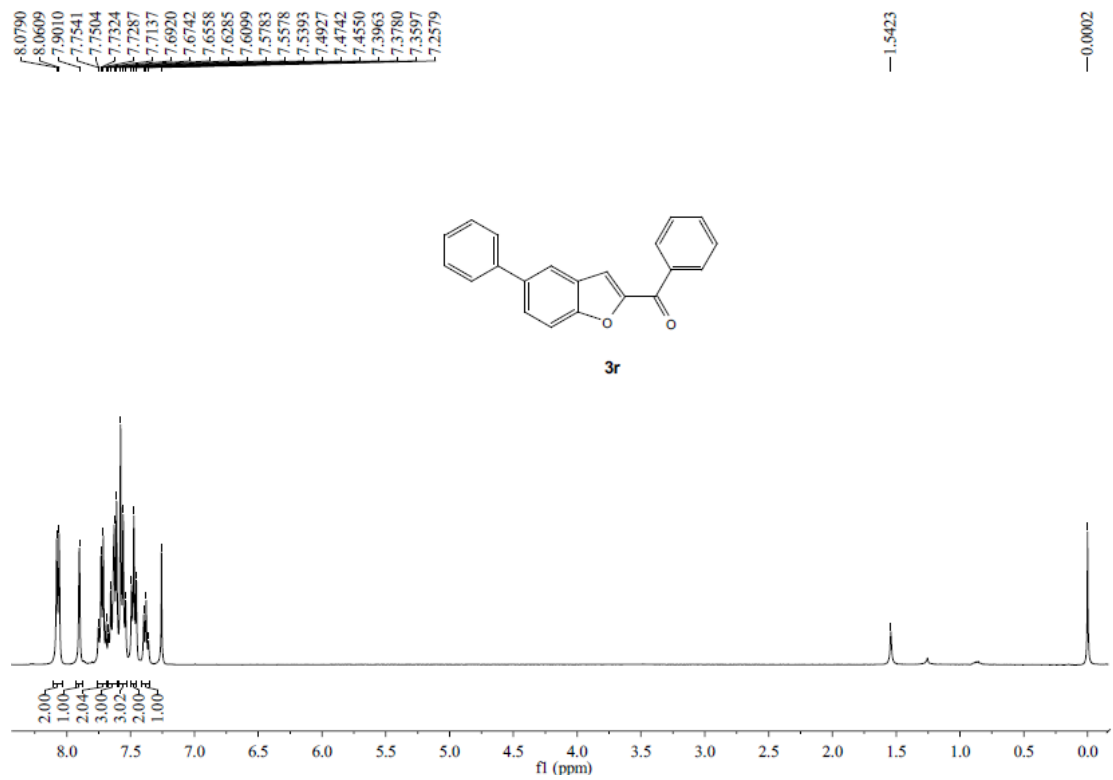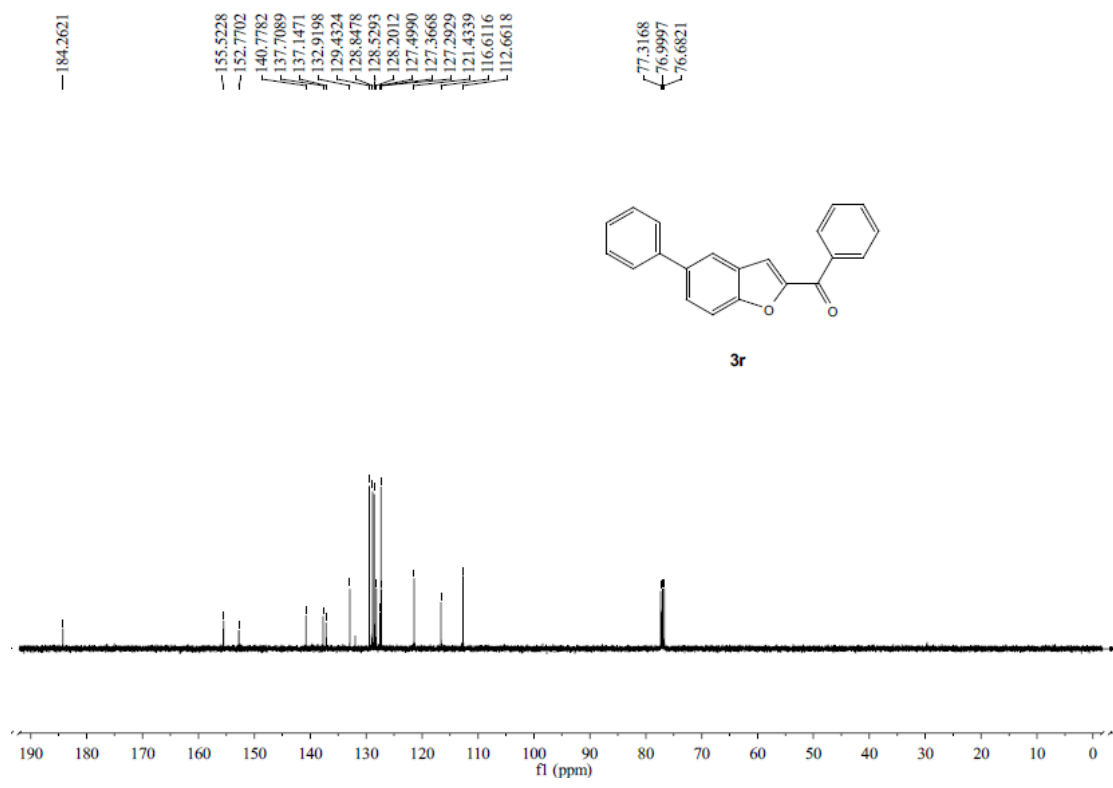

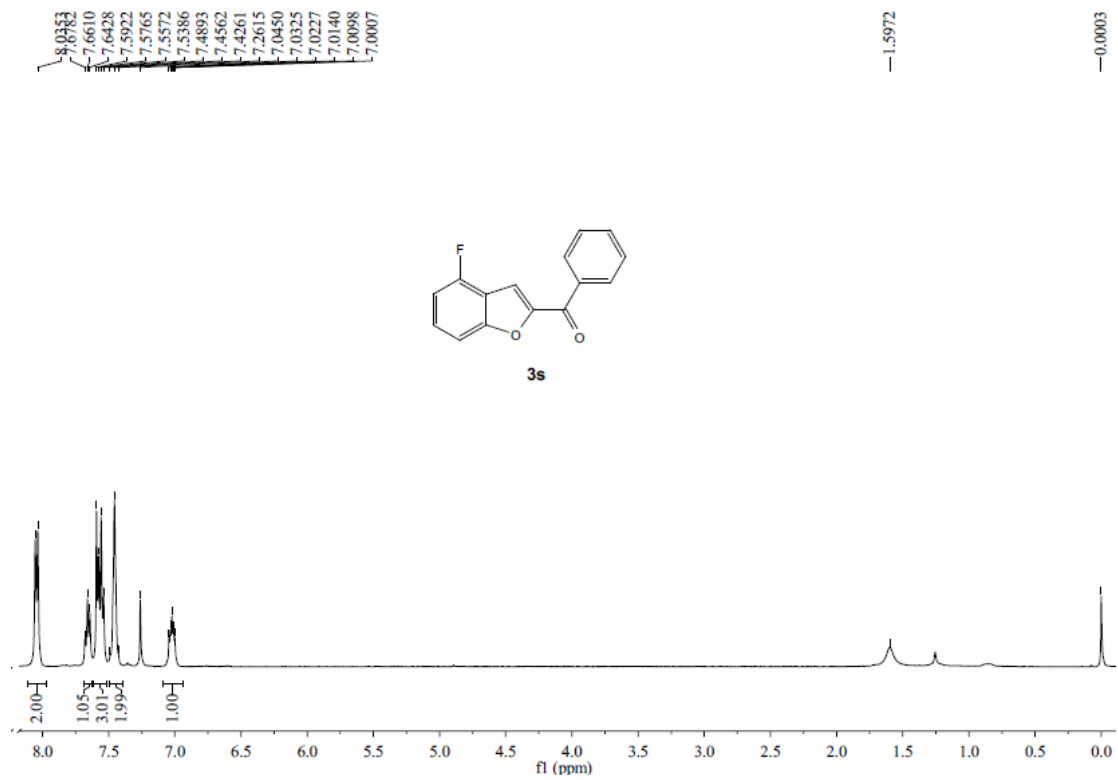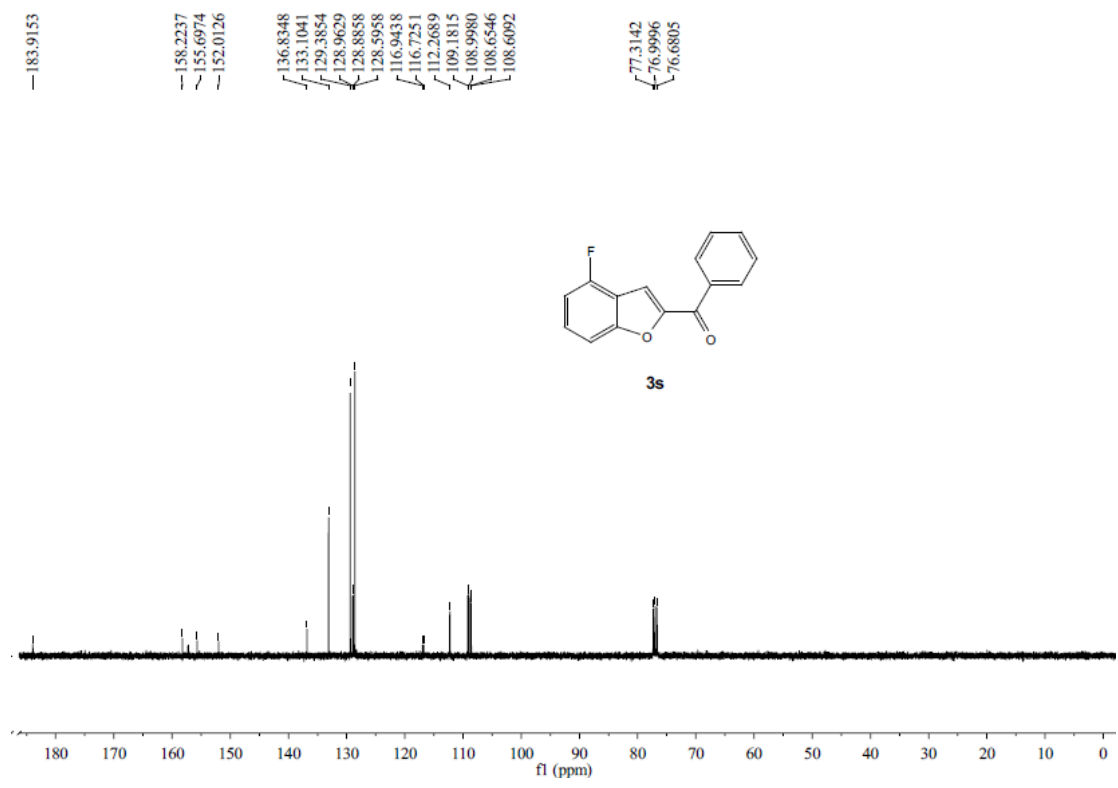

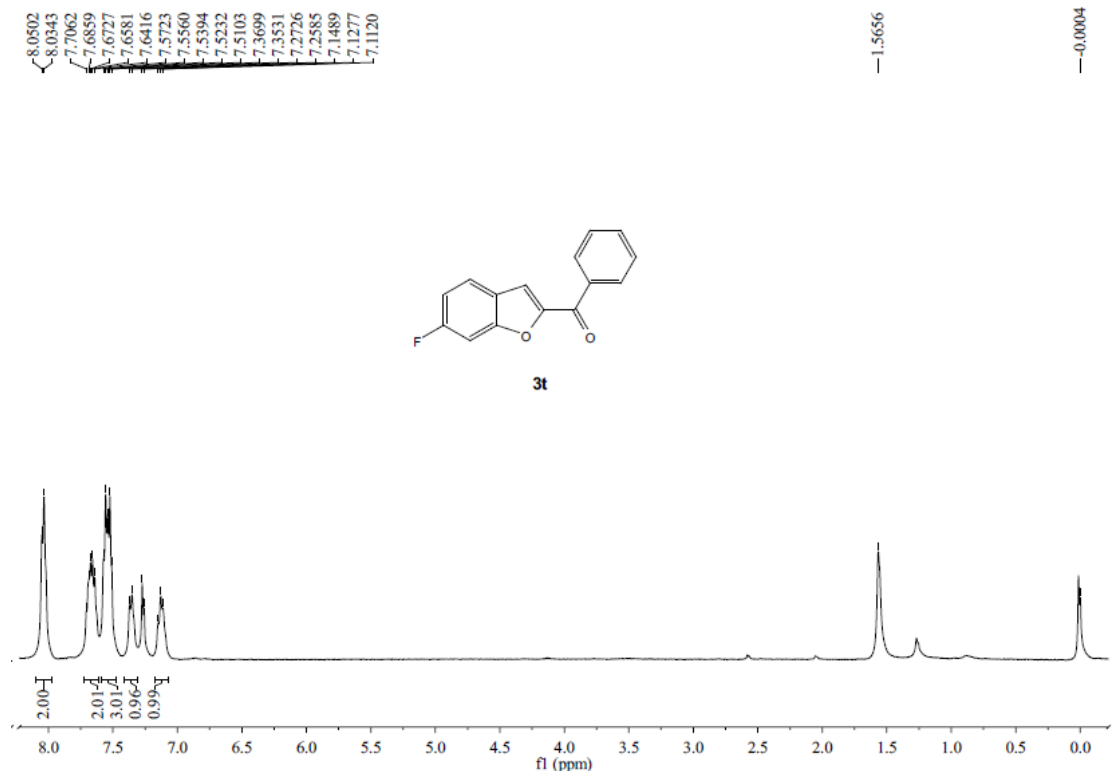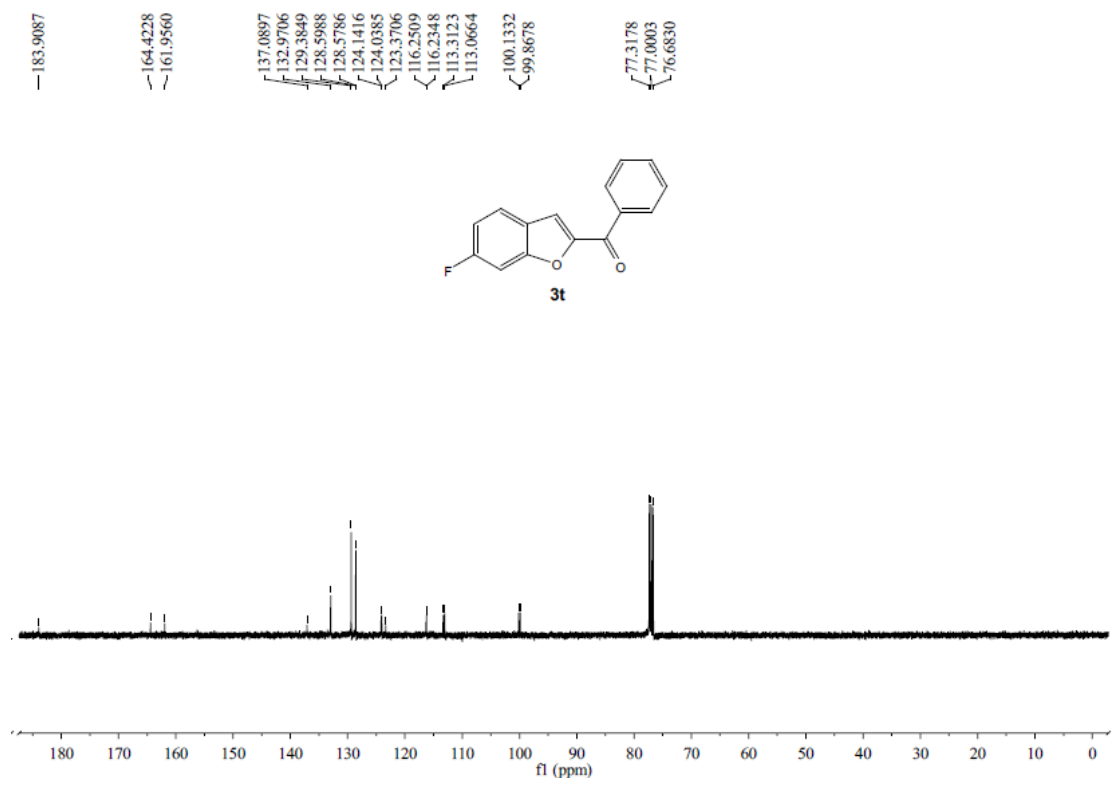

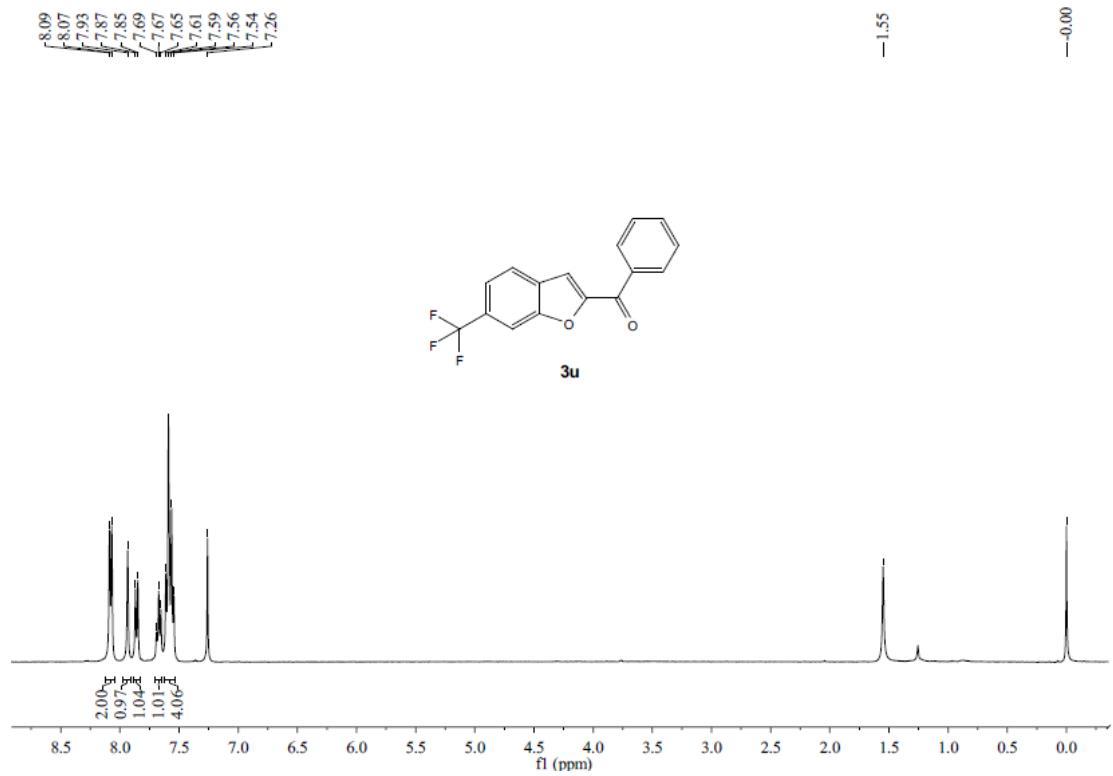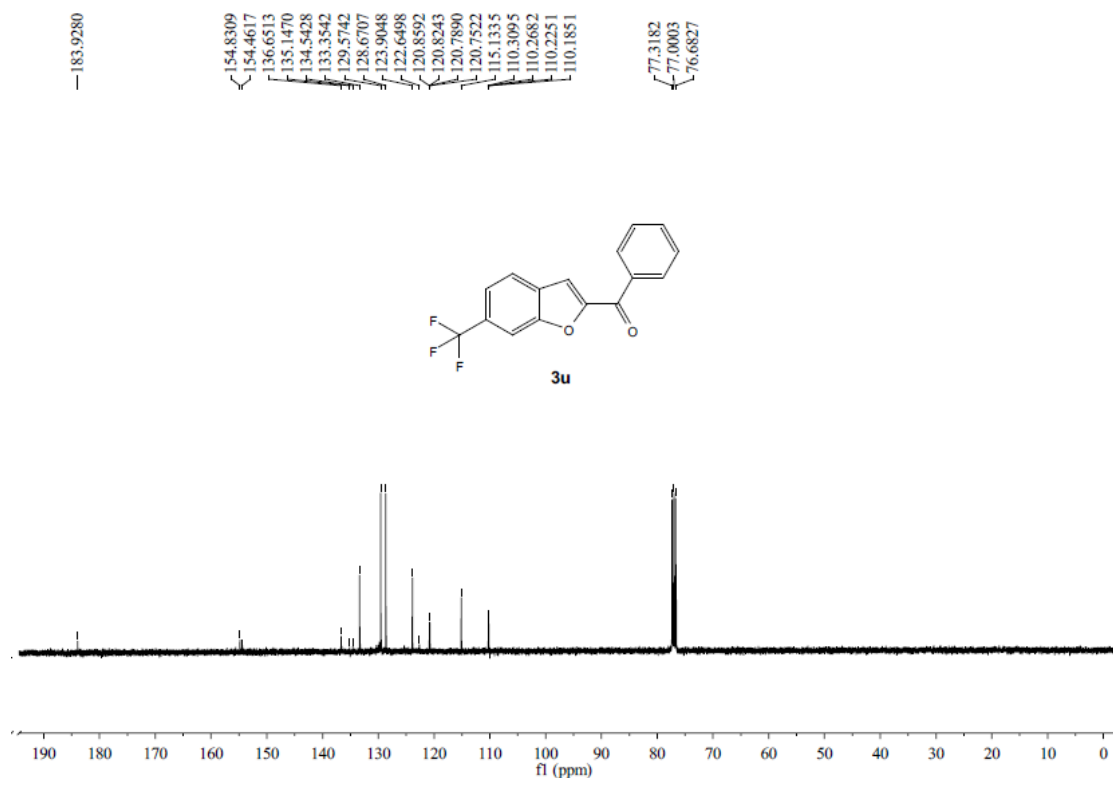

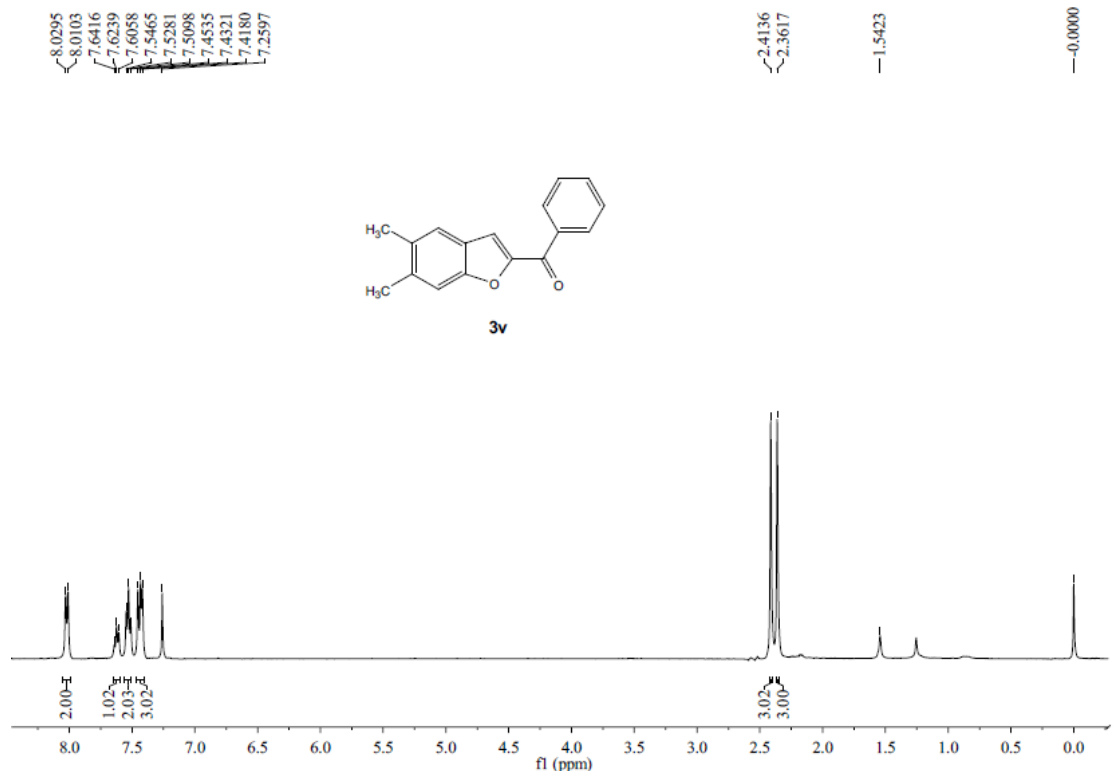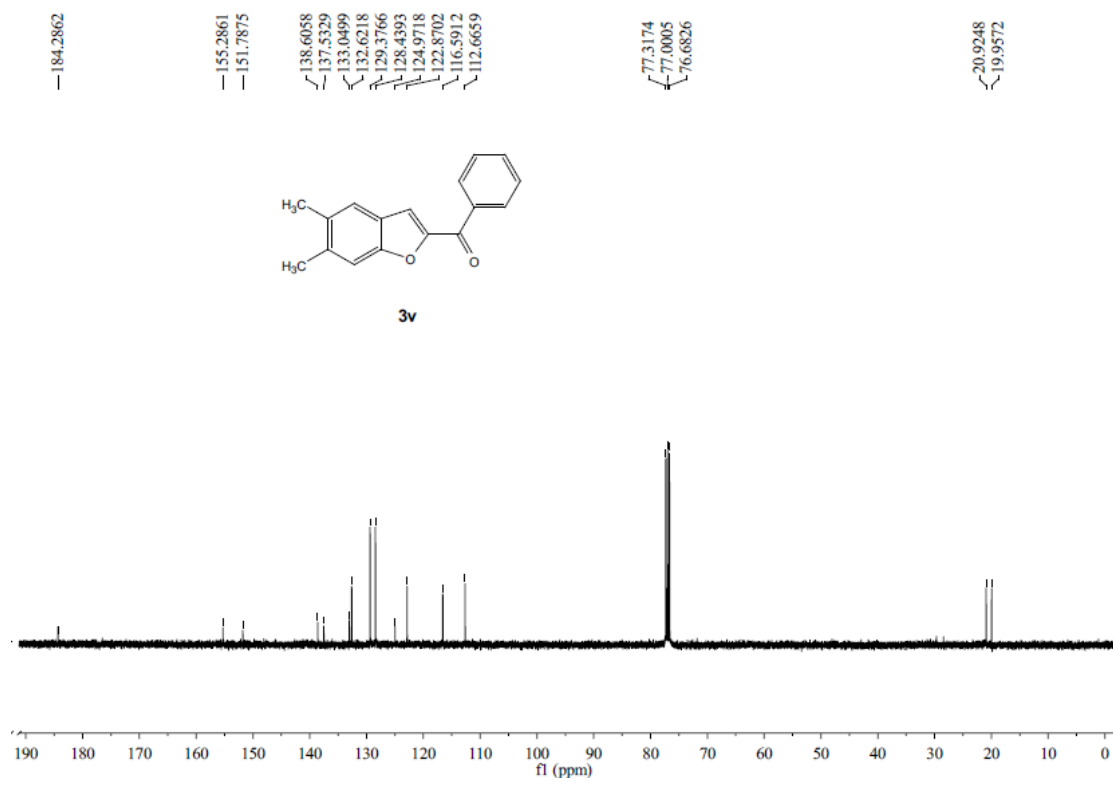

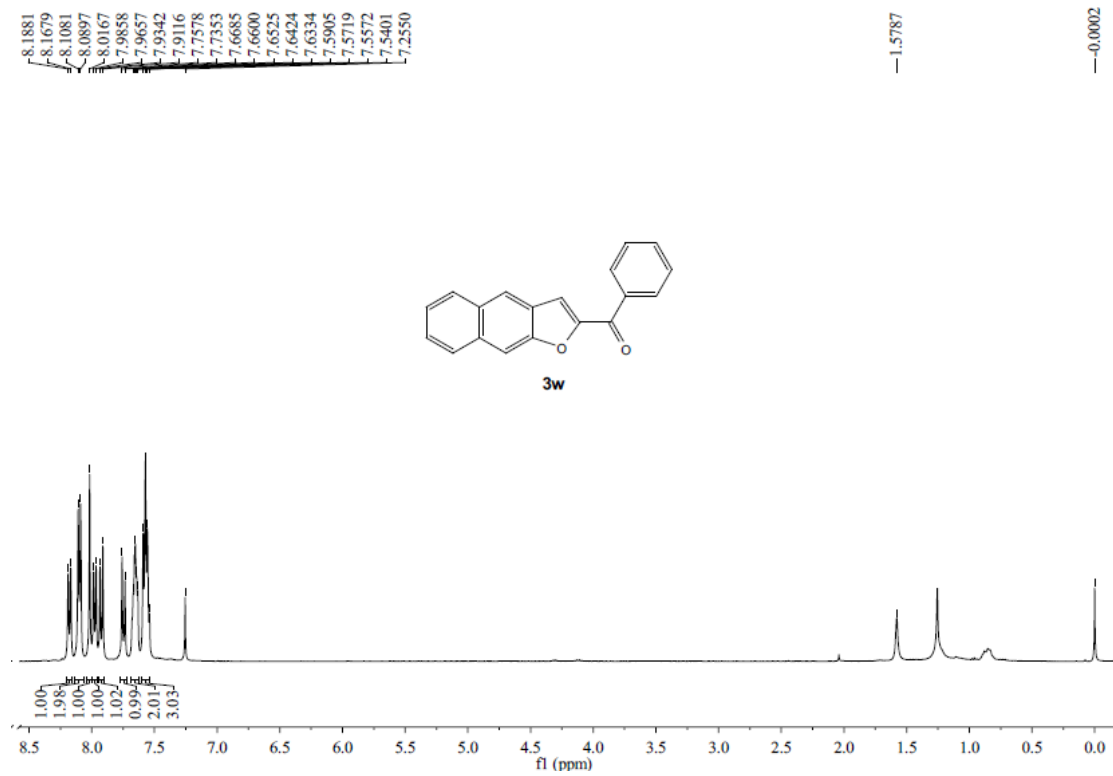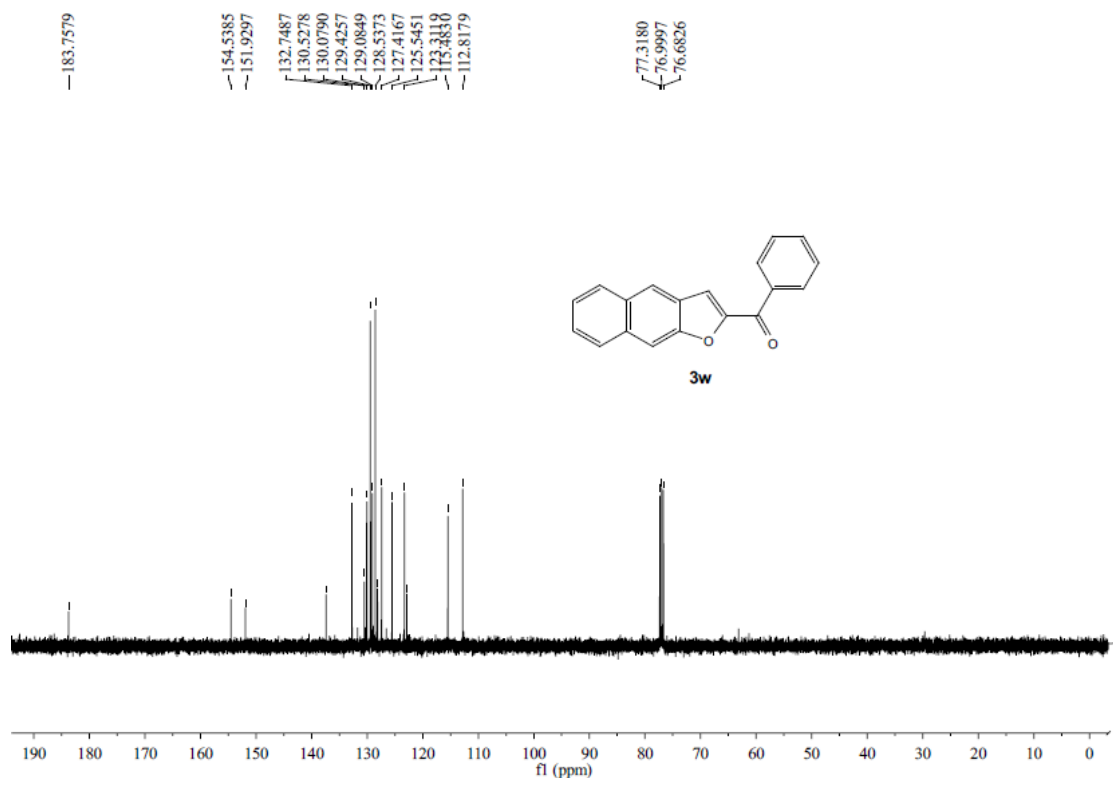

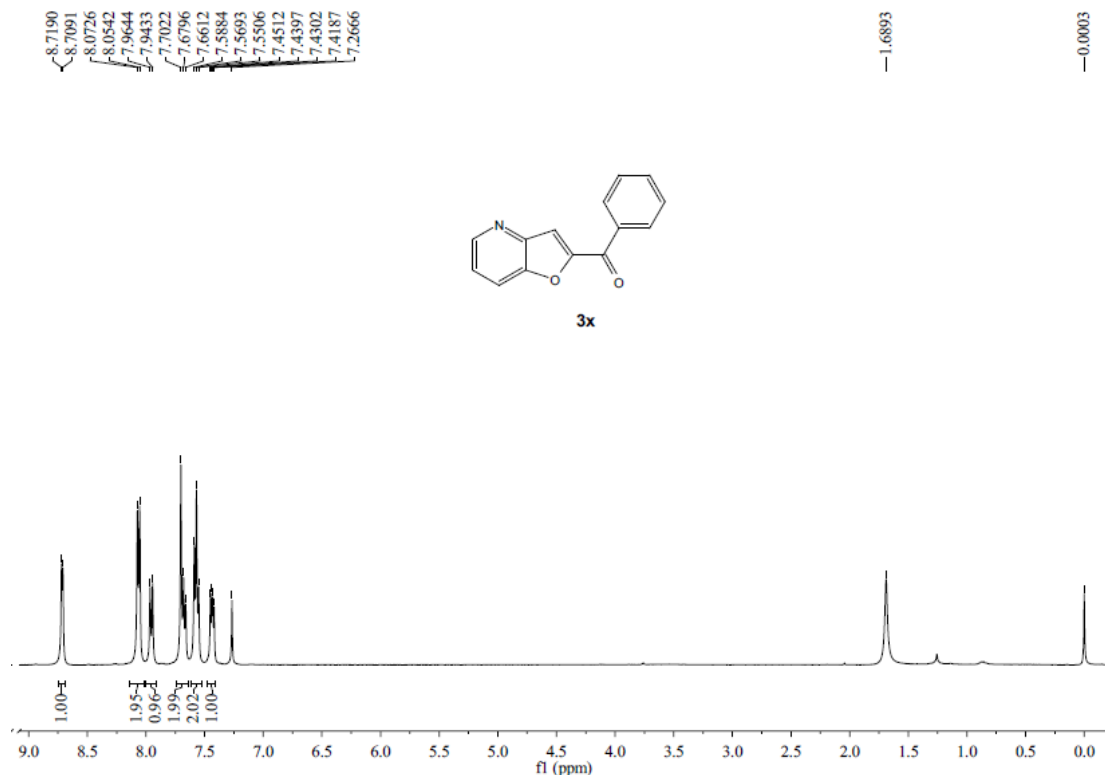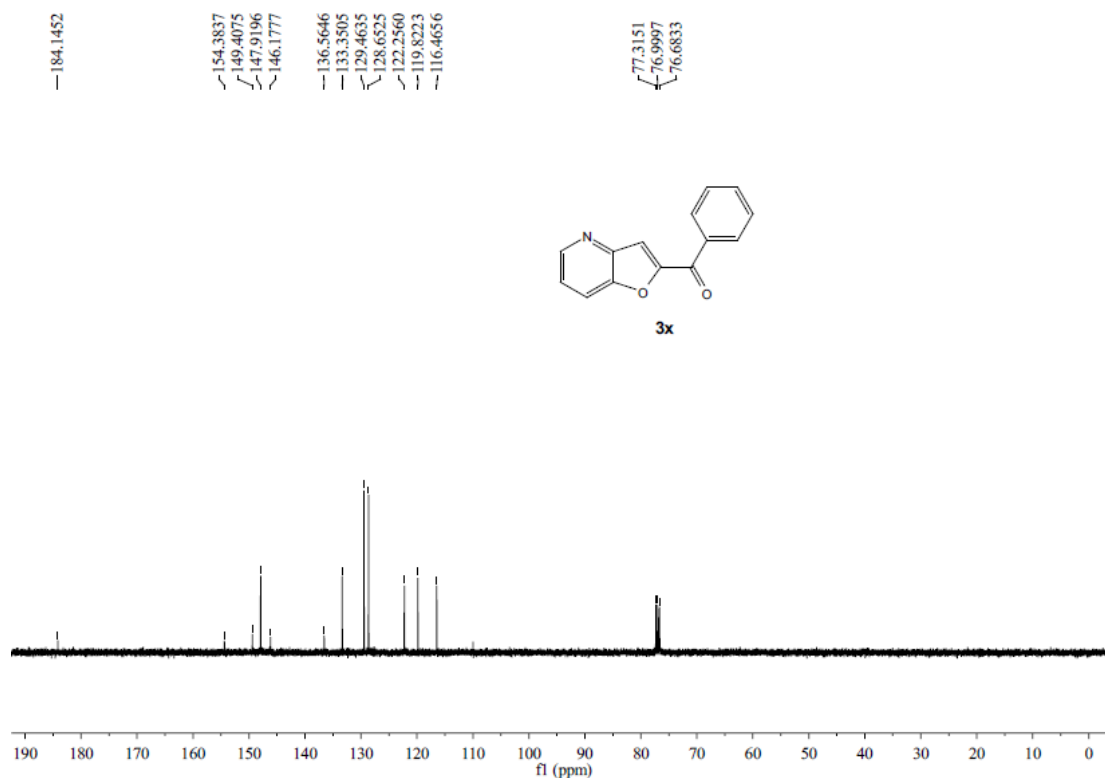



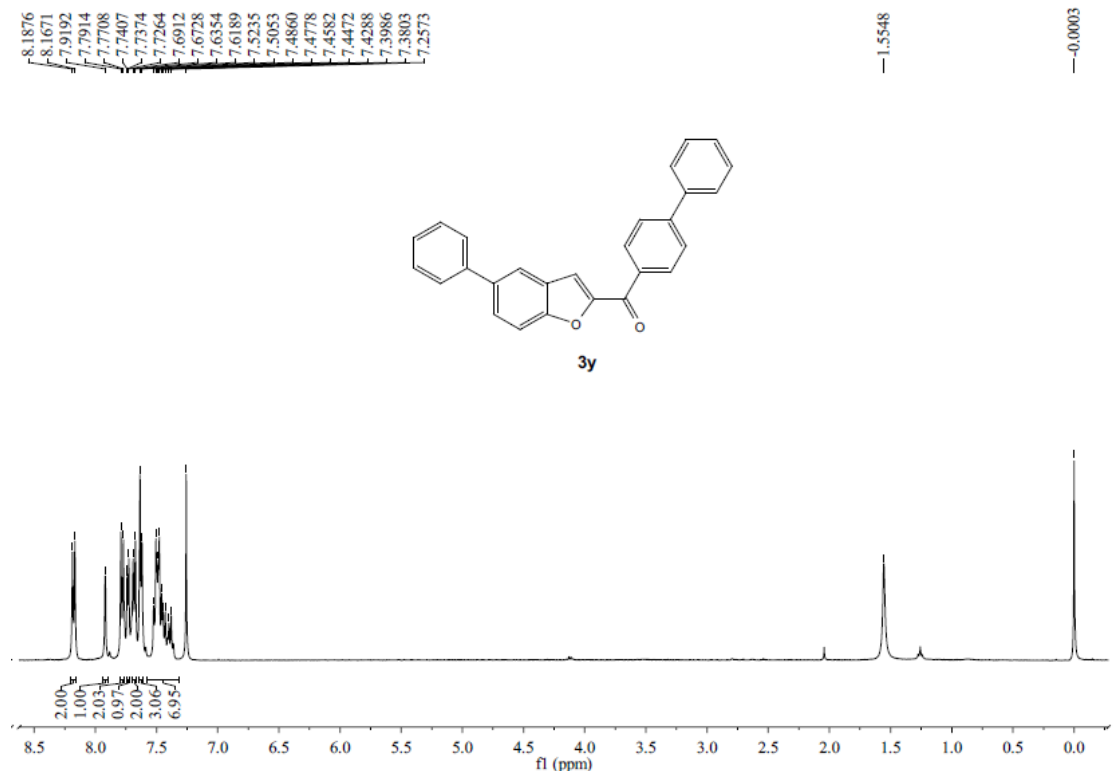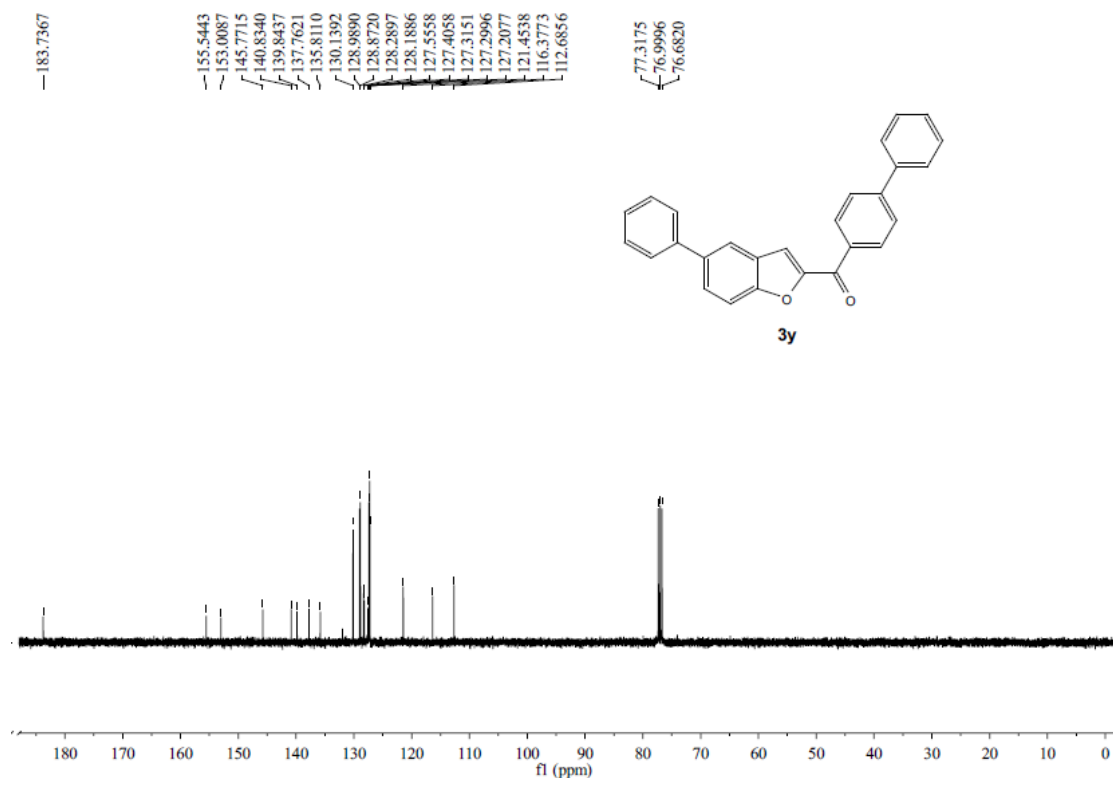

Supplement: c6ob00198j1.pdf [file c6ob00198j1.pdf]
